1 **Phytoplasma SAP11 effector destabilization of TCP transcription factors**  
2 **differentially impact development and defence of Arabidopsis versus maize**

3

4 **Short title: SAP11 targeting of TCPs impacts maize architecture but not defence.**

5

6 Pascal Pecher<sup>1¶</sup>, Gabriele Moro<sup>1¶</sup>, Maria Cristina Canale<sup>1,2,#a</sup>, Sylvain Capdevielle<sup>1</sup>, Archana  
7 Singh<sup>1,#b</sup>, Allyson MacLean<sup>1,#c</sup>, Akiko Sugio<sup>1,#d</sup>, Chih-Horng Kuo<sup>3</sup>, Joao R. S. Lopes<sup>2</sup> and  
8 Saskia A. Hogenhout<sup>1</sup>

9

10 <sup>1</sup>John Innes Centre, Department of Crop Genetics, Norwich Research Park, Norwich NR4  
11 7UH, UK

12 <sup>2</sup>Luiz de Queiroz College of Agriculture, Department of Entomology and Acarology,  
13 University of São Paulo, Piracicaba 13418-900, Brazil

14 <sup>3</sup>Academia Sinica, Institute of Plant and Microbial Biology, Taipei, Taiwan.

15 <sup>#a</sup> Agricultural Research Company of Santa Catarina State (Epagri), Chapeco 89809-450,  
16 Brazil

17 <sup>#b</sup> Earlham Institute, Norwich Research Park, Norwich NR4 7UZ, UK.

18 <sup>#c</sup> Department of Biology, University of Ottawa, Ottawa, ON, K1N 6N5, Canada.

19 <sup>#d</sup> INRA, UMR Institut de Génétique, Environnement et Protection des Plantes (IGEPP)  
20 Domaine de la Motte, 35653 Le Rheu cedex - France

21

22 \*Corresponding author:

23 Email: [saskia.hogenhout@jic.ac.uk](mailto:saskia.hogenhout@jic.ac.uk)

24 ¶These authors contributed equally to this work

25

26

## 27 **Abstract**

28 Phytoplasmas are insect-transmitted bacterial pathogens that colonize a wide range of plant  
29 species, including vegetable and cereal crops, and herbaceous and woody ornamentals.  
30 Phytoplasma-infected plants often show dramatic symptoms, including proliferation of shoots  
31 (witch's brooms), changes in leaf shapes and production of green sterile flowers (phyllody).  
32 Aster Yellows phytoplasma Witches' Broom (AY-WB) infects dicots and its effector,  
33 secreted AYWB protein 11 (SAP11), was shown to be responsible for the induction of shoot  
34 proliferation and leaf shape changes of plants. SAP11 acts by destabilizing TEOSINTE  
35 BRANCHED 1-CYCLOIDEA-PROLIFERATING CELL FACTOR (TCP) transcription  
36 factors, particularly the class II TCPs of the CYCLOIDEA/TEOSINTE BRANCHED 1  
37 (CYC/TB1) and CINCINNATA (CIN)-TCP clades. SAP11 homologs are also present in  
38 phytoplasmas that cause economic yield losses in monocot crops, such as maize, wheat and  
39 coconut. Here we show that a SAP11 homolog of Maize Bushy Stunt Phytoplasma (MBSP),  
40 which has a range primarily restricted to maize, destabilizes only TB1/CYC TCPs.  
41 SAP11<sub>MBSP</sub> and SAP11<sub>AYWB</sub> both induce axillary branching and SAP11<sub>AYWB</sub> also alters leaf  
42 development of *Arabidopsis thaliana* and maize. However, only in maize, SAP11<sub>MBSP</sub>  
43 prevents female inflorescence development, phenocopying maize *tbl* lines, whereas  
44 SAP11<sub>AYWB</sub> prevents male inflorescence development and induces feminization of tassels.  
45 SAP11<sub>AYWB</sub> promotes fecundity of the AY-WB leafhopper vector on *A. thaliana* and  
46 modulates the expression of *A. thaliana* leaf defence response genes that are induced by this  
47 leafhopper, in contrast to SAP11<sub>MBSP</sub>. Neither of the SAP11 effectors promote fecundity of  
48 AY-WB and MBSP leafhopper vectors on maize. These data provide evidence that class II  
49 TCPs have overlapping but also distinct roles in regulating development and defence in a  
50 dicot and a monocot plant species that is likely to shape SAP11 effector evolution depending  
51 on the phytoplasma host range.

52

53 Keywords: Insect vector; Phytoplasma; Plant architecture; Plant defence response; Plant  
54 development; Plant-insect interactions; SAP11 effectors; TCP transcription factors.

55

## 56 **Author summary**

57 Phytoplasmas are parasites of a wide range of plant species and are transmitted by sap-  
58 feeding insects, such as leafhoppers. Phytoplasma-infected plants are often easily recognized  
59 because of their dramatic symptoms, including shoot proliferations (witch's brooms) and  
60 altered leaf shapes, leading to severe economic losses of crops, ornamentals and trees  
61 worldwide. We previously found that the virulence protein SAP11 of aster yellows witches'  
62 broom phytoplasma (AY-WB) interferes with a specific group of plant transcription factors,  
63 named TCPs, leading to witches' brooms and leaf shape changes of the model plant  
64 *Arabidopsis thaliana*. SAP11 has been characterized in a number of other phytoplasmas.  
65 However, it is not known how phytoplasmas and their SAP11 proteins modulate processes in  
66 crops, including cereals such as maize. We identified a SAP11 homolog in Maize bushy stunt  
67 phytoplasma (MBSP), a pathogen that can cause severe yield losses of maize. We found that  
68 SAP11 interactions with TCPs are conserved between maize and Arabidopsis, and that  
69 MBSP SAP11 interferes with less TCPs compared to AY-WB SAP11. This work provides  
70 new insights into how phytoplasmas change maize architecture and corn production.  
71 Moreover, we found that TCPs regulate leaf defence responses to phytoplasma leafhopper  
72 vectors in Arabidopsis, but not in maize.

73

74

## 75 **Introduction**

76 Phytoplasmas (“*Candidatus* (*Ca.*) Phytoplasma”) are economically important plant  
77 pathogens that infect a broad range of plant species. The more than 1000 phytoplasmas  
78 described so far comprise three distinct clades within a monophyletic group of the class  
79 Mollicutes that are characterized by the lack of a bacterial cell wall and small genomes  
80 (580 kb to 2200 kb) [1-3]. These fastidious pathogens are restricted to the phloem sieve cells  
81 of the plant vasculature and depend on phloem-sap-feeding insect vectors, including  
82 leafhoppers, planthoppers and psyllids, for transmission and spread in nature [4]. Many  
83 phytoplasmas induce dramatic changes in plant architecture such as increased axillary  
84 branching (often referred to as witches’ broom), formation of leaf-like flowers (phyllody), the  
85 production of green floral organs such as petals and stamens (virescence), changes of leaf  
86 shape, and premature bolting [5-10].

87 Phytoplasmas change plant architecture via the secretion of proteinaceous effectors that  
88 interact with and destabilize plant transcription factors with fundamental roles in regulating  
89 plant development. Effectors of Aster yellows phytoplasma strain Witches Broom (AY-WB;  
90 “*Ca.* Phytoplasma asteris”) are particularly well characterized. AY-WB and its predominant  
91 leafhopper vector *Macrostelus quadrilineatus* have broad host ranges that mostly include  
92 dicots, including *Arabidopsis thaliana* [6]. SAP11 destabilizes *Arabidopsis* TEOSINTE  
93 BRANCHED1-CYCLOIDEA-PROLIFERATING CELL FACTOR (TCP) transcription  
94 factors, and specifically class II TCPs, leading to the induction of axillary branching and  
95 changes in leaf shape of this plant [8,11], and SAP54 degrades *Arabidopsis* MADS-box  
96 transcription factors leading to changes in flower development that resemble phyllody and  
97 virescence symptoms [9,12]. Moreover, both effectors modulate plant defence responses  
98 leading to increased colonization of *M. quadrilineatus* on *A. thaliana* [8,9,13]. For  
99 SAP11<sub>AYWB</sub> this involves the inhibition of jasmonate (JA) synthesis [8]. SAP11 and SAP54

100 homologs of other phytoplasmas also target TCPs and MADS, respectively, leading to  
101 corresponding changes in plant development and architecture [10,14-16]. The majority of  
102 phytoplasma effector genes lie within composite-transposon-like pathogenicity islands named  
103 potential mobile units (PMUs) that are prone to recombination and horizontal gene transfer  
104 [17-20].

105 Maize bushy stunt phytoplasma (MBSP) belongs to the Aster yellows (AY) group  
106 (16SrI) “*Ca. P. asteris*” [21] and is the only known member of this group to be largely  
107 restricted to maize (*Z. mays* L.), whereas the majority, including AY-WB, are transmitted by  
108 polyphagous insects and infect dicotyledonous plants [13,22]. MBSP is transmitted by the  
109 maize-specialist insects *Dalbulus maidis* and *D. elimatus*; both MBSP and insect vectors are  
110 thought to have co-evolved with maize since its domestication from teosinte [23]. Symptoms  
111 of MBSP-infected maize plants include the formation of long lateral branches, decline in ear  
112 development and emergence of leaves that are often twisted with ripped edges and that  
113 display chlorosis and reddening [13]. We previously identified a SAP11 homolog in the  
114 MBSP genome [22] and SAP11<sub>MBSP</sub> is identical in sequence among multiple MBSP isolates  
115 collected from Mexico and Brazil [13]. *SAP11<sub>AYWB</sub>* and *SAP11<sub>MBSP</sub>* lie on microsyntenic  
116 regions within the phytoplasma genomes, indicating that these effectors are likely to have  
117 common ancestry [13]. However, *D. maidis* does not produce more progeny on MBSP-  
118 infected plants that show advanced disease symptoms; the insects prefer infected plants that  
119 are non-symptomatic [24]. In this study we wished to compare the roles of SAP11<sub>AYWB</sub> and  
120 SAP11<sub>MBSP</sub> in symptom induction and plant defence to insect vectors of *A. thaliana* and  
121 maize.

122 TCP transcription factors comprise an ancient plant-specific family [25] that are  
123 distinguished from other transcription factors by a conserved  $\pm 60$  amino acid TCP domain  
124 [26]. The TCP domain consists of a helix-loop-helix region that form TCP homo or

125 heterodimers and a basic region that mediates interactions of TCP dimers with DNA motifs  
126 [27] and is required for SAP11 binding to TCPs [11]. TCP transcription factors are grouped  
127 into three clades based on TCP domain sequences: (i) class I PROLIFERATING CELL  
128 FACTOR-type TCPs (PCF clade); (ii) class II CINCINNATA-type TCPs (CIN clade); and  
129 (iii) class II CYCLOIDEA/TEOSINTE BRANCHED 1-type TCPs (CYC/TB1-clade) [28].  
130 The latter is also known as the glutamic acid-cysteine-glutamic acid (ECE) clade [29]. PCFs  
131 promote cell proliferation, whereas CIN clade TCPs promote leaf and petal cell maturation  
132 and differentiation and have antagonistic roles to PCFs [30-33]. The ECE clade includes  
133 maize TEOSINTE BRANCHED 1 (TB1) and TB1 homologs of *A. thaliana* BRANCHED 1  
134 (BRC1) and BRC2, that repress the development of axillary branches in plants [34-37], and  
135 CYCLOIDEA (CYC) that control flower symmetry [38]. TB1 and genes in the TB1 network  
136 have been targeted for selection during maize domestication from a teosinte ancestor [39,40].

137 Here we show that SAP11<sub>AYWB</sub> and SAP11<sub>Mbsp</sub> have overlapping but distinct  
138 specificities for destabilizing class II TCP transcription factors. The SAP11 effectors induce  
139 unique phenotypes in Arabidopsis and maize that indicate divergent roles of class II TCP  
140 transcription factors in regulating development and defence in the two plant species. We  
141 argue that SAP11<sub>Mbsp</sub> evolution may be constrained due to the specific functionalities of  
142 class II TCPs in maize.

143

## 144 **Results**

145

### 146 **Phytoplasma SAP11<sub>AYWB</sub> binds and destabilizes both Arabidopsis CIN and CYC/TB1** 147 **TCPs and SAP11<sub>Mbsp</sub> only CYC/TB1 TCPs**

148 SAP11<sub>AYWB</sub> and SAP11<sub>Mbsp</sub> interaction specificities for Arabidopsis TCPs (AtTCPs)  
149 were investigated via yeast two-hybrid (Y2H) assays and protein destabilization assays in

150 *A. thaliana* mesophyll protoplasts. In the protoplast experiments, SAP11<sub>AYWB</sub> destabilized the  
151 majority of AtCIN-TCPs and none of the class I AtTCPs (Fig. 1A), confirming previous  
152 results [8]. In addition, SAP11<sub>AYWB</sub> also destabilized CYC/TB1-TCPs BRC1 and BRC2 but  
153 not the five Arabidopsis class I TCPs (Fig. 1A). In contrast, SAP11<sub>MBSP</sub> destabilized the  
154 CYC/TB1 TCPs BRC1 and BRC2, whereas 7 out of 8 class II AtCIN-TCPs and all tested  
155 class I AtTCPs remained stable (Fig. 1A). The Y2H assays showed that SAP11<sub>AYWB</sub> interacts  
156 with Arabidopsis CIN-TCPs (Fig. 1B), confirming previous data [8,11], whereas SAP11<sub>MBSP</sub>  
157 did not (Fig. 1B). However, both SAP11<sub>AYWB</sub> and SAP11<sub>MBSP</sub> interacted with CYC/TB1  
158 BRC1 and BRC2 (Fig. 1B). Therefore, SAP11<sub>MBSP</sub> binds and destabilizes a narrower set of  
159 class II TCPs compared to SAP11<sub>AYWB</sub>.

160 To investigate which region of TCP domain determine SAP11 binding specificity,  
161 chimeras of the basic region and helix loop helix regions of the TCP domains of CIN-TCP  
162 AtTCP2 and CYC/TB1-TCP BRC1 (AtTCP18) were constructed (Fig. 2) and tested for  
163 interactions with the two SAP11 proteins in yeast two-hybrid analyses. SAP11<sub>AYWB</sub> and  
164 SAP11<sub>MBSP</sub> interacted with the TCP domains of AtTCP2 and BRC1 (Fig. 2B), as observed  
165 for full length TCPs (Fig. 1B), confirming that the TCP domain itself is sufficient for SAP11  
166 interaction and specificity. Furthermore, SAP11<sub>AYWB</sub> interacted with all AtTCP2-BRC1  
167 chimeras used in the assay (Fig. 2), whereas SAP11<sub>MBSP</sub> interacted with chimeras containing  
168 BRC1 helix-loop-helix and AtTCP2 basic regions, but not with those composed of AtTCP2  
169 helix-loop-helix and BRC1 basic region or with mixed helix, loop and helix sequences (Fig.  
170 2). Therefore, the entire helix-loop-helix region of the TCP domain is required for the  
171 specific binding of SAP11<sub>MBSP</sub> to CYC/TB1 TCPs.

172

173 ***A. thaliana* plants stably expressing SAP11<sub>MBSP</sub> and SAP11<sub>AYWB</sub> phenocopy *brc1 brc2***  
174 **mutant or CIN-TCP knock down lines**

175 To investigate if the SAP11 binding specificity to TCPs aligns with *in planta*  
176 interactions, phenotypes of *A. thaliana* Col-0 stable transgenic lines that produce SAP11<sub>AYWB</sub>  
177 and SAP11<sub>MBSP</sub> under control of the 35S promoter (Fig. 1C) were compared to those of the  
178 *A. thaliana brc1-2 brc2-1* double mutant, hereafter referred to as the *brc1 brc2* mutant, which  
179 is a *null* mutant for both CYC/TB1-TCPs BRC1 and BRC2 [34] and the *35S::miR319a x*  
180 *35S::miR3TCP* line in which CIN-TCPs are knocked down [30]. Whereas the crinkled leaves  
181 of *35S::SAP11<sub>AYWB</sub>* lines phenocopied those of *35S::miR319a x 35S::miR3TCP* (Fig. 1D) [8],  
182 leaves of *35S::SAP11<sub>MBSP</sub>* lines were not crinkled and more similar to WT Col-0 leaves (Fig.  
183 1D). Rosette diameters of the *35S::SAP11<sub>AYWB</sub>* and *35S::miR319a x 35S::miR3TCP* lines  
184 were smaller than WT Col-0 plants, unlike the rosettes of *35S::SAP11<sub>MBSP</sub>* and *A. thaliana*  
185 *brc1 brc2* mutant lines that looked similar to those of WT plants (Fig. 1F). Both  
186 *35S::SAP11<sub>AYWB</sub>* and *35S::SAP11<sub>MBSP</sub>* lines produced significantly more primary rosette-leaf  
187 branches (RI) [34] than WT plants. With exception of the *35S::SAP11<sub>MBSP</sub>* line 3 that had a  
188 lower number of RIs, the production of RI was similar to the *A. thaliana brc1 brc2* mutant. In  
189 contrast, *35S::miR319a x 35S::miR3TCP* plants produced a reduced number of RI compared  
190 to WT Col-0 (Figs. 1E and 1G, S1E Fig.). Therefore, *35S::SAP11<sub>MBSP</sub>* lines phenocopied the  
191 *A. thaliana brc1 brc2* mutant and the *35S::SAP11<sub>AYWB</sub>* lines both the *A. thaliana brc1 brc2*  
192 and *35S::miR319a x 35S::miR3TCP* mutant lines, indicating that SAP11<sub>AYWB</sub> destabilizes  
193 Arabidopsis CIN and CYC/TB1 TCPs and SAP11<sub>MBSP</sub> only the CYC/TB1-TCPs BRC1 and  
194 BRC2, in agreement with the results of protoplast-based destabilization and Y2H binding  
195 assays.

196 Beyond phenotypes described above, we found that the *35S::miR319a x 35S::miR3TCP*  
197 and *35S::SAP11<sub>AYWB</sub>* lines produced less rosette leaves compared to WT plants, unlike the  
198 *A. thaliana brc1 brc2* and *35S::SAP11<sub>MBSP</sub>* lines (S1A Fig.). Bolting time, plant height and  
199 numbers of primary cauline-leaf branches (CI) [34] were variable among the *35S::SAP11<sub>AYWB</sub>*



200 and 35S::*SAP11*<sub>MBSP</sub> lines (S1B-S1E Figs.). Roots of 35S::*miR319a* x 35S::*miR3TCP* and  
201 35S::*SAP11*<sub>AYWB</sub> lines were consistently shorter compared to WT plants as described by Lu *et*  
202 *al.* [41]. In contrast, the root length of *A. thaliana brcl brc2* and 35S::*SAP11*<sub>MBSP</sub> lines did  
203 not show obvious differences compared to those of WT plants (S2 Fig.).

204

205 **SAP11<sub>AYWB</sub> impairs *A. thaliana* defence responses to *M. quadrilineatus* in contrast to**  
206 **SAP11<sub>MBSP</sub>**

207 We previously showed that the AY-WB insect vector *M. quadrilineatus* produces 20-  
208 30% more progeny on 35S::*SAP11*<sub>AYWB</sub> *A. thaliana* [8]. By repeating this experiment and  
209 including 35S::*SAP11*<sub>MBSP</sub> *A. thaliana*, we confirmed the previous result for 35S::*SAP11*<sub>AYWB</sub>  
210 *A. thaliana* but not for 35S::*SAP11*<sub>MBSP</sub> *A. thaliana* (Fig. 3A). Therefore, SAP11<sub>AYWB</sub> appears  
211 to modulate plant defences in response to *M. quadrilineatus*, whereas SAP11<sub>MBSP</sub> does not.  
212 To test this further, the transcriptomes of wild type, 35S::*SAP11*<sub>AYWB</sub> and 35S::*SAP11*<sub>MBSP</sub>  
213 *A. thaliana* with and without exposure to *M. quadrilineatus* were compared via RNA-seq (S1  
214 Table, GEO accession GSE118427). PCA showed that, in samples exposed to  
215 *M. quadrilineatus*, 35S::*SAP11*<sub>MBSP</sub> and WT Col-0 group together, whereas the  
216 35S::*SAP11*<sub>AYWB</sub> samples form a separate group (Fig. 3B). Therefore, SAP11<sub>AYWB</sub> has a  
217 measurable impact on the transcriptome of *A. thaliana*, unlike SAP11<sub>MBSP</sub>.

218 Analyses of differentially expressed genes (DEGs) of Col-0 and transgenic plants  
219 exposed to *M. quadrilineatus* identified 96 DEGs for 35S::*SAP11*<sub>AYWB</sub> versus Col-0 and only  
220 one DEG for 35S::*SAP11*<sub>MBSP</sub> versus Col-0 (Figs. 3C and 3D). Hierarchical cluster of the  
221 DEGs expression levels was in agreement with the PCA results demonstrating that the  
222 *M. quadrilineatus*-exposed 35S::*SAP11*<sub>AYWB</sub> treatments cluster separately from those of  
223 Col-0 and 35S::*SAP11*<sub>MBSP</sub> (Fig. 3E, S2 Table). Moreover, *M. quadrilineatus*-exposed  
224 35S::*SAP11*<sub>AYWB</sub> treatments cluster together with non-exposed samples. Of the 96 DEGs 30

225 have a role in regulating plant defence responses, including hormone and secondary  
226 metabolism, such as Myb, AP2/EREBP and bZIP transcription factors, receptor kinases,  
227 cytochrome P450 enzymes, proteases, oxidases and transferases (highlighted in yellow,  
228 S3 Table). The 96 genes also included 11 natural anti-sense genes and at least 30 genes with  
229 unknown functions. Taken together, these data indicate that defence responses to  
230 *M. quadrilineatus* are suppressed in 35S::SAP11<sub>AYWB</sub> plants.

231

### 232 **Identification of maize TCP transcription factors**

233 To investigate SAP11 interactions with maize TCPs we first identified maize TCP  
234 sequences. The CDS of 44 *Z. mays* (Zm) TCPs available on maize TFome collection [42]  
235 were extracted from the Grass Regulatory Information Server (GRASSIUS)  
236 (<http://grassius.org/grasstfdb.html>) [43]. We identified two class II CYC/TB1-TCPs,  
237 including TB1 and ZmTCP18, 10 class II CIN-TCPs and 17 class I PCF-like TCPs. The  
238 ZmTCPs were assigned to groups based on characteristic TCP domain amino acids conserved  
239 in each of the groups, highlighted in yellow, red and green (Fig. 4) [28]. In contrast to  
240 *A. thaliana*, maize appears to have an additional group of class II TCPs that share amino  
241 acids conserved in the TCP domains of both CIN and TB1/CYC TCPs (Fig. 4). One of these  
242 is BRANCHED ANGLE DEFECTIVE1 (BAD1), which is expressed in the pulvinus to  
243 regulate branch angle emergence of inflorescences, particularly the tassel [44]. BAD1 was  
244 placed in a subclade of CYC-TB1 TCPs named as TCP CII. Hence, we assigned all members  
245 in this additional group to TCP CII. TCPs similar to TCP CII appear to be absent in the  
246 monocots rice (*O. sativa*) and sorghum (*S. bicolor*) (S3 and S4 Figs., S4 Table). Seven CIN-  
247 TCPs of maize, rice and sorghum are potentially regulated by miR319a (Fig. 4, S3-S5 Figs).  
248 While this study was ongoing, Chai *et al.* [45] reported the expression characteristics of 29  
249 maize TCPs. To promote consistency, we adopted their nomenclature for these TCPs as

250 ZmTCP01 to ZmTCP29, and continued the numbering of the additional 15 maize TCP genes  
251 extracted from GRASSIUS as ZmTCP30 to ZmTCP45 (Fig. 4, S4 Table).

252

### 253 **Phytoplasma SAP11 homologs interact with and destabilize maize class II TCPs**

254 Y2H assays revealed that SAP11<sub>MBSP</sub> interacts with the CYC/TB1-TCPs ZmTCP02  
255 (TB1) and ZmTCP18, but not with ZmTCP members of the CIN and CII subgroups (Fig.  
256 5A). In contrast, SAP11<sub>AYWB</sub> interacted also with CIN and CII ZmTCPs (Fig. 5A). GFP-  
257 SAP11<sub>MBSP</sub> and GFP-SAP11<sub>AYWB</sub> destabilized HA-tagged ZmTCP02 (TB1) and ZmTCP18  
258 in maize protoplasts in contrast to GFP controls (Fig. 5B), indicating that the SAP11  
259 homologs also destabilize maize TCPs in maize cells.

260

### 261 **Stable *SAP11*<sub>MBSP</sub> and *SAP11*<sub>AYWB</sub> transgenic maize plants lack female and male sex 262 organs, respectively**

263 *SAP11*<sub>AYWB</sub> and *SAP11*<sub>MBSP</sub> were cloned as N-terminal 3XFLAG tag fusions  
264 downstream of the maize Ubiquitin promoter, and transformed into HiIAXHiIB hybrid  
265 *Z. mays*. *Ubi::FLAG-SAP11*<sub>MBSP</sub> primary transformants (T<sub>0</sub>) were female sterile, but produced  
266 pollen, which were used for fertilizing flowers of a wild type HiIIA plant. In contrast,  
267 *Ubi::FLAG-SAP11*<sub>AYWB</sub> primary transformants were male sterile, but produced flowers, which  
268 were successfully fertilized with pollen from a HiIIA plant. The T<sub>1</sub> progenies of both crosses  
269 had similar production of SAP11 proteins (Fig. 5C) and were further phenotyped.

270 Unlike WT HiIIA, *Ubi::FLAG-SAP11*<sub>MBSP</sub> T<sub>1</sub> plants produced multiple tillers arising  
271 from the base of the main culm (Figs. 5D (a, c) and 6). Both main culm and tillers produced  
272 apical male inflorescences with tassels that carried anthers with pollen (Figs. 5D (j, l, insets 7,  
273 10, 11) and 6). These pollen were fertile, as they were used to pollinate HiIIA female  
274 inflorescence for seed reproduction. At the upper nodes of the main culm where in WT plants

275 short primary lateral branches with apical ears would develop from the leaf sheath (Figs 5D  
276 (g) and 6), long primary lateral branches emerged that also had apical tassels (Figs 5D (i,  
277 inset 3) and 6). Hence, *Ubi::FLAG-SAP11<sub>MBSP</sub>* plants were female sterile. These phenotypes  
278 of *Ubi::FLAG-SAP11<sub>MBSP</sub>* plants are similar to those of the *Z. mays tb1* mutant (Fig. 6)  
279 [39,46]. Essentially, *Ubi::FLAG-SAP11<sub>MBSP</sub>* and *Z. mays tb1* mutant lines resemble teosinte,  
280 though the latter produces small ears located at multiple lateral positions of the primary  
281 lateral branches (Fig. 6) [47]. Therefore, *Ubi::FLAG-SAP11<sub>MBSP</sub>* plants phenocopy the maize  
282 *tb1* mutant, in agreement with results of yeast two-hybrid and protoplast destabilization  
283 assays showing that SAP11<sub>MBSP</sub> destabilizes CYC/TB1 TCPs.

284 *Ubi::FLAG-SAP11<sub>AYWB</sub>* T<sub>1</sub> plants also produced more tillers from the base of the main  
285 culm, but were shorter than WT HiIIA and *Ubi::FLAG-SAP11<sub>MBSP</sub>* (Fig. 5D (a, b, c)). The  
286 majority of leaves of *Ubi::FLAG-SAP11<sub>AYWB</sub>* plants had curly edges, unlike *Ubi::FLAG-*  
287 *SAP11<sub>MBSP</sub>* and HiIIA plants (Fig. 5D (d, e, f, h, inset 2)). *Ubi::FLAG-SAP11<sub>AYWB</sub>* plants  
288 produced red-coloured silks emerging directly from the leaf sheath without prior ear  
289 formation (Figs. 5D (h, inset 2) and 6). Upon pollination of the red-coloured silks, ears with  
290 reduced husk leaves and exposed corn emerged (Fig. 5E (o)). As well, the tip of the main  
291 culm and tillers carried tassel-like structures with female flowers and emerging silks (Figs.  
292 5D (k, insets 8, 9) and 6). Pollination of these silks with HiIIA pollen induced the formation  
293 of a few cobs (Fig. 5E (m,n)). Thus, *SAP11<sub>AYWB</sub>* induces tassel feminization and interferes  
294 with leaf development, including the modified leaves that generate the husk of the ear.

295

296 **SAP11<sub>AYWB</sub> or SAP11<sub>MBSP</sub> do not alter maize susceptibility to *M. quadrilineatus* and**  
297 ***D. maidis***

298 We investigated if SAP11<sub>AYWB</sub> and SAP11<sub>MBSP</sub> modulate maize processes in response  
299 to the AY-WB and MBSP insect vectors *M. quadrilineatus* and *D. maidis*, respectively. We

300 did not observe any differences in fecundity of both insect vectors on HiIIA, *Ubi::FLAG-*  
301 *SAP11<sub>AYWB</sub>* and *Ubi::FLAG-SAP11<sub>MBSP</sub>* plants (Fig. 7A and B). PCA of RNA-seq data from  
302 WT and transgenic maize plants indicate that *SAP11<sub>AYWB</sub>* and *SAP11<sub>MBSP</sub>* modulate maize  
303 transcriptomes with *SAP11<sub>AYWB</sub>* having a larger effect than *SAP11<sub>MBSP</sub>* (Fig. 7C and D, S5  
304 and S6 Tables, GEO: GSE118427), in agreement with morphological data of the maize lines  
305 (Figs. 5 and 6). However, *M. quadrilineatus*-exposed HiIIA *Ubi::FLAG-SAP11<sub>AYWB</sub>* and  
306 *Ubi::FLAG-SAP11<sub>MBSP</sub>* maize clustered together and separately from non-exposed maize in  
307 PCA (Fig. 7C). *D. maidis* exposed maize samples grouped with the non-exposed ones (Fig.  
308 7D), suggesting that the *SAP11* homologs do not have obvious effects on transcriptome  
309 responses of maize to the insects. Moreover, *M. quadrilineatus* has a larger impact and  
310 *D. maidis* a minor impact on maize gene expression (Fig. 7C and D). Together, these data  
311 indicate that *SAP11<sub>AYWB</sub>* and *SAP11<sub>MBSP</sub>* do not alter maize susceptibility to  
312 *M. quadrilineatus* and *D. maidis*.

313

## 314 **Discussion**

315 We found that *SAP11<sub>AYWB</sub>* and *SAP11<sub>MBSP</sub>* have overlapping, but distinct, binding  
316 specificities for class II TCP transcription factors. The two effectors bind to the TCP domain  
317 helix-loop-helix region. This region is required for TCP-TCP dimerization and configuration  
318 of the TCP domain beta sheets of both TCP transcription factors in a way that allows binding  
319 of the beta sheets to promoters [27]. We also found that *SAP11*-TCP binding specificities are  
320 correlated with the ability of the *SAP11* homologs to destabilize these TCPs in leaves [8] and  
321 protoplasts (this study) and the induction of specific phenotypes in plants [8, this study].  
322 Whereas it remains to be resolved how *SAP11* destabilizes TCPs, it is clear that *SAP11* is  
323 highly effective at destabilizing TCPs in plants as evidenced by the specific *SAP11*-induced

324 changes in *A. thaliana* and maize architectures that phenocopy TCP mutants and knock-down  
325 lines of these plants.

326 TCP domains of each TCP (sub)class have characteristic amino acid sequences that  
327 have remained conserved after the divergence of monocots and eudicots [48]. We found that  
328 SAP11 binding specificity is determined by TCP (sub)class rather than plant species, as  
329 SAP11<sub>MBSP</sub> specifically interacts with class II CYC/TB1-TCPs of both *A. thaliana* and maize,  
330 and not class II CIN-TCP and class I TCPs of these divergent plant species. Similarly,  
331 SAP11<sub>AYWB</sub> interacts with all class II TCPs and not the class I TCPs of *A. thaliana* and  
332 maize. Therefore, SAP11<sub>AYWB</sub> and SAP11<sub>MBSP</sub> binding specificity is likely to involve amino  
333 acids within the helix-loop-helix region of the TCP domain that are characteristic for each  
334 TCP (sub)class and are conserved among plants species, including dicots and monocots.

335 We found that SAP11<sub>MBSP</sub> specifically interacts with and destabilizes TCPs of the TB1  
336 clade, including *A. thaliana* BRC1 and BRC2 and maize TCP02 and TCP18. These binding  
337 specificities are supported by plant phenotypes; *A. thaliana* 35S::SAP11<sub>MBSP</sub> and maize  
338 *Ubi::FLAG-SAP11<sub>MBSP</sub>* lines phenocopy *A. thaliana* *brc1 brc2* lines and maize *tb1* lines,  
339 respectively. The *A. thaliana* 35S::SAP11<sub>MBSP</sub> lines show stem proliferations, in agreement  
340 with *A. thaliana* BRC1 and BRC2 and maize TB1 (ZmTCP02) being suppressors of axillary  
341 bud growth [37,49-51]. We also show that *A. thaliana* 35S::SAP11<sub>MBSP</sub> and *brc1 brc2* lines  
342 produce fully fertile flowers, whereas maize *Ubi::FLAG-SAP11<sub>MBSP</sub>* plants produced only  
343 male tassels and no female inflorescences like maize *tb1* plants [39,46]. This is in agreement  
344 with BRC1 not directly affecting *A. thaliana* flower architecture [52,53], and maize TB1  
345 being a direct positive regulator of MADS-box transcription factors that control maize female  
346 inflorescence architecture [40]. Interestingly, many phytoplasmas have SAP54 effectors,  
347 which degrade MADS-box transcription factors leading to the formation of leaf-like sterile  
348 flowers [9,10,54,55] whereas no effector gene with sequence similarity to SAP54 was

349 identified in MBSP [56]. It is possible that the maize-specialist phytoplasma strain does not  
350 require an additional effector (such as SAP54) to modulate floral development of its host, as  
351 SAP11<sub>MBSP</sub> indirectly targets flowering via TB1.

352 Whereas SAP11<sub>MBSP</sub> interacts and destabilizes TB1 TCPs, SAP11<sub>AYWB</sub> interacts with  
353 all class II TCPs of *A. thaliana* and maize, in agreement with *A. thaliana* 35S::*SAP11*<sub>AYWB</sub>  
354 lines phenocopying both *A. thaliana* *brc1 brc2* and *A. thaliana* 35S::*miR319a x*  
355 35S::*miR3TCP* lines. Information about the role of TCPs in maize development are limited,  
356 potentially due to redundant functions of TCPs belonging to the same subgroup and the  
357 challenges of obtaining multiple knockdown lines. Therefore, at this time we do not know if  
358 maize *Ubi*::*FLAG-SAP11*<sub>AYWB</sub> lines phenocopy maize mutant lines for all CIN and CII TCPs.  
359 Nonetheless the leaf crinkling phenotypes of *Ubi*::*FLAG-SAP11*<sub>AYWB</sub> maize plants are in  
360 agreement with what is known about the functions of CIN TCPs in Arabidopsis where CIN  
361 TCPs play a role in leaf development [8,32,57]. The CII subgroup member BAD1 regulates  
362 branch angle emergence of the maize tassel [44] indicating that CII TCPs regulate male  
363 inflorescence development in maize. Our finding that *Ubi*::*FLAG-SAP11*<sub>AYWB</sub> maize plants  
364 solely producing female inflorescences and no tassels expands the current knowledge about  
365 maize CII and CIN-TCPs to a potential role in plant sex determination. We cannot fully  
366 exclude the possibility that SAP11<sub>AYWB</sub> destabilizes other proteins in maize, though we think  
367 this is unlikely given our finding that SAP11-TCP interactions are specific involving  
368 conserved TCP helix-loop-helix sequences and that SAP11<sub>AYWB</sub> induces changes in  
369 *A. thaliana* development that are entirely consistent with destabilization of class II TCPs in  
370 this plant. Therefore, phenotypes seen of *Ubi*::*FLAG-SAP11*<sub>AYWB</sub> maize plants are likely  
371 caused by SAP11<sub>AYWB</sub>-mediated destabilization of all maize class II TCPs, indicating a direct  
372 role of these TCPs in the development of maize male and female inflorescence architectures.

373 We previously demonstrated that 35S::SAP11<sub>AYWB</sub> *A. thaliana* plants are affected in  
374 jasmonate production and *LOX2* expression upon wounding and that the AY-WB insect  
375 vectors produce more progeny on *LOX2*-silenced plants [8]. A number of TCPs have roles in  
376 plant JA production regulation [31,58-63]. Here, we show a clear role of SAP11<sub>AYWB</sub>  
377 suppression of plant defence response genes to *M. quadrilineatus*, including those involved in  
378 phytohormone responses. These genes were not differentially regulated in SAP11<sub>MBSP</sub> plants  
379 response to *M. quadrilineatus*, indicating that destabilization of CIN-TCPs alone or in  
380 combination with Arabidopsis BRC1 and BRC2 alters plant defence responses to  
381 *M. quadrilineatus*. SAP11<sub>AYWB</sub> does not promote *M. quadrilineatus* and *D. maidis* fecundity  
382 on maize suggesting that maize class II TCPs do not play a major role in regulating defence  
383 responses of maize leaves. Therefore, class II TCPs appear to regulate plant defence  
384 responses in leaves of Arabidopsis but not in maize.

385 MBSP and the insect vectors *D. maidis* and *D. elimatus* are thought to have co-evolved  
386 with maize since its domestication from teosinte [23]. We previously sequenced the genomes  
387 of MBSP isolates from geographically distant locations and found single nucleotide  
388 polymorphisms (SNPs) throughout the genomes of these isolates but that SAP11<sub>MBSP</sub>  
389 remained conserved [56]. The effector may be subject to purifying selection because the  
390 destabilization of maize TB1 TCPs and subsequent induction of axillary branching and  
391 inhibition of female flower production promote MBSP fitness in maize in a manner that is so  
392 far unknown. As well, SAP11<sub>MBSP</sub> evolution may be constrained by possibly negative effects  
393 of maize CIN and ECE TCP destabilization on MBSP fitness or because SAP11<sub>MBSP</sub> alleles  
394 that destabilize other maize TCPs may not be selected in MBSP populations because maize  
395 TCPs do not impact *D. maidis* fitness. Finally, both *D. maidis* and MBSP predominantly  
396 colonize maize, whereas *M. quadrilineatus* and AYWB colonize a wide range of plants  
397 species presenting the possibility that a positive effect of SAP11 on insect fecundity may



398 have more benefit for a generalist phytoplasma and insect vector than for more specialized  
399 ones.

400 In conclusion, we found that SAP11 effectors of AY-WB and MBS phytoplasmas have  
401 evolved to target overlapping but distinct class II TCPs of their plant hosts and that these  
402 transcription factors also have overlapping but distinct roles in regulating development in  
403 these plant species. In addition, TCPs may or may not impact plant defence responses to  
404 phytoplasma leafhopper vectors. The distinct roles of TCPs in regulating plant developmental  
405 and defence networks are likely to shape SAP11 effector evolution of phytoplasma.

406

## 407 **Material and Methods**

### 408 **Generation of Gateway™ compatible entry clones**

409 We generated Gateway™ compatible entry clones for all experiments, except for the  
410 constructs to transform maize. The cloning of the codon-optimized version of SAP11<sub>AYWB</sub>  
411 without the sequence corresponding to the signal peptide into pDONR207 is described  
412 previously [8]. The cloning of sequences corresponding to the open reading frames (ORFs) of  
413 AtTCP2, AtTCP3, AtTCP4, AtTCP5, AtTCP7, AtTCP10, AtTCP13 and AtTCP17 (S4  
414 Table) into pDONR207 was also done previously [7]. The full-length ORF of AtTCP6,  
415 AtTCP8, AtTCP9, AtTCP12, AtTCP14 and AtTCP18 (S4 Table) were PCR amplified from  
416 complementary DNA (cDNA) with gene-specific primers that contain partial sequences of  
417 the attB1 and attB2 Gateway™ recombination sites (S7 Table). The fragments were further  
418 amplified with attB1 and attB2 adapter primers and cloned into pDONR207 with Gateway™  
419 BP Clonase II Enzyme Mix (Invitrogen, Carlsbad, USA). Gateway™ compatible  
420 pENTR/SD/D/TOPO vectors containing the full length ORFs of ZmTCP01 (clone UT5707),  
421 ZmTCP02 (clone UT5978), ZmTCP05 (clone UT1680), ZmTCP12 (clone UT6182),  
422 ZmTCP13 (clone UT3439) and ZmTCP18 (clone UT4097) were ordered from The

423 Arabidopsis Information Resource (TAIR) (S4 Table). A codon-optimized version of  
424 SAP11<sub>MBSP</sub> without the sequence corresponding to the signal peptide and DNA sequences  
425 corresponding to the TCP domains of ZmTCP9, AtTCP12, AtTCP18 and the AtTCP  
426 chimeras were gene synthesized by Genscript (New Jersey, USA) with Gateway<sup>TM</sup>  
427 compatible attL1 and attL2 attachment sites (S4 and S8 Tables) and provided in pMS  
428 (Genscript).

429

### 430 **Transient expression assays in *Arabidopsis thaliana* and maize (*Zea mays* L.) protoplasts**

431 All genes were transferred from the Gateway<sup>TM</sup> compatible entry clones into the  
432 respective expression vectors with the Gateway<sup>TM</sup> LR Clonase II enzyme mix (Invitrogen).  
433 Full-length ORFs of all TCPs were cloned into pUGW15 [64] to produce N-terminally  
434 HA-tagged proteins. The codon-optimized versions of SAP11<sub>AYWB</sub> and SAP11<sub>MBSP</sub> without  
435 signal peptide sequences were cloned into pUBN-GFP-DEST [65] to produce N-terminally  
436 GFP-tagged SAP11<sub>AYWB</sub> and SAP11<sub>MBSP</sub>. To generate a plasmid for expression of GFP  
437 alone, the ccdB cassette of pUBN-GFP-DEST was replaced with a GFP sequence that carries  
438 two translational stop codons instead of the translational start codon. The GFP-sequence was  
439 amplified from pUBN-GFP-DEST with the gene-specific primers STOP-GFP forward and  
440 reverse (S7 Table), cloned into pDONR207 with the Gateway<sup>TM</sup> BP Clonase II Enzyme Mix  
441 (Invitrogen) and transferred to pUBN-GFP-DEST using the Gateway<sup>TM</sup> LR Clonase II  
442 Enzyme Mix (Invitrogen).

443 Isolation and transformation of Arabidopsis and maize protoplasts were performed as  
444 described by [66]. Protoplasts were generated from 6-week-old Arabidopsis and four-leaf  
445 stage maize plants grown in controlled environmental conditions with a 14h, 22 C°/ 10h,  
446 20°C light / dark period. The maize plants were transferred into dark for five days before  
447 protoplast isolation. 600- $\mu$ l-protoplast-suspensions were transformed with the indicated

448 constructs and placed in the dark for 12h for gene expression. Protoplasts were harvested by  
449 mild centrifugation (1 min, 200 x g) and mixed with 20 $\mu$ l 2X sodium dodecyl sulfate (SDS)-  
450 polyacrylamide gel electrophoresis (PAGE) sample buffer (50mM Tris/HCl, 10% (w:v) SDS,  
451 50% (v:v) glycerol, 0.02% bromophenolblue, 10%  $\beta$ -mercaptoethanol, pH=6.8). Samples  
452 were separated in an SDS-PAGE using 15% SDS-polyacrylamide gels and blotted on 0.45 $\mu$ m  
453 BA85 Whatman® Protran® nitrocellulose membranes (Sigma-Aldrich) with the BioRad  
454 (Life Science, Hemel Hempstead, UK) minigel and blotting system. Proteins were detected  
455 via western blot hybridization with specific antibodies. For detection of GFP-fusion proteins,  
456 anti-GFP polyclonal primary antibody (Santa Cruz Biotechnology, DALLAS, USA, catalog  
457 number: sc-8334, diluted 1:1000) and anti-rabbit-HRP secondary antibody (Sigma-Aldrich,  
458 diluted 1:10000) were used. After the anti GFP-antibodies were removed by treatment of the  
459 membrane with 0.2 M glycine, 0.1% SDS, 100 mM  $\beta$ -mercaptoethanol, pH=2, the HA-fusion  
460 proteins were detected on the same blot with anti-HA11 monoclonal primary antibody  
461 (Covance, New Jersey, USA, order number: MMS-101P, diluted 1:1000) and anti-mouse-  
462 HRP secondary antibody (Sigma-Aldrich, diluted 1:10000).

463

#### 464 **Yeast Two-Hybrid analyses**

465 All genes were transferred from the above generated Gateway™ compatible entry  
466 clones into the respective Yeast Two-Hybrid vectors with the Gateway™ LR Clonase II  
467 enzyme mix (Invitrogen). The codon-optimized sequences corresponding to mature proteins  
468 (without signal peptides) of SAP11<sub>AYWB</sub> and SAP11<sub>MBSP</sub> were transferred into pDEST-GAD-  
469 T7 [67]. The TCP sequences encoding for full length TCPs or TCP domains were transferred  
470 into the pDEST-GBK-T7 [67]. *Saccharomyces cerevisiae* strain AH109 (Matchmaker III;  
471 Clontech Laboratories, Mountain View, CA, USA) was transformed using a 96-well  
472 transformation protocol [68] and interaction studies were carried out on media depleted of

473 leucine, tryptophan and histidine with addition of 20 mM 3-Amino-1,2,4-triazole (3AT) to  
474 suppress auto activation.

475

#### 476 **Generation and analysis of transgenic *A. thaliana* lines**

477 The generation and analysis of the 35S::SAP11<sub>AYWB</sub> Arabidopsis Col-0 lines, was  
478 described previously [8]. Idan Efroni (Weizmann Institute of Science, Rehovot, Israel)  
479 provided seeds of the 35S::miR319a x 35S::miR3TCP Arabidopsis Col-0 lines described in  
480 Efroni *et al.* [30] and Pilar Cubas (Centro Nacional de Biotecnologia, Madrid, Spain)  
481 provided seeds of the *brc1 brc2* Arabidopsis Col-0 line described in Aguilar-Martinez *et al.*  
482 [34]. For generation of the 35S::SAP11<sub>MBSP</sub> Arabidopsis Col-0 lines the codon optimized  
483 version of the *SAP11*<sub>MBSP</sub> sequence without the sequence corresponding to the signal peptide  
484 was transferred from the Gateway<sup>TM</sup> compatible entry clone (described above) into the  
485 pB7WG2 binary vector using the Gateway<sup>TM</sup> LR Clonase II Enzyme Mix (Invitrogen) and  
486 Arabidopsis Col-0 plants were transformed using the floral dipping method [69].

487

#### 488 **Quantitative Real Time-PCR experiments**

489 SAP11 transcript levels in 35S::SAP11<sub>AYWB</sub> and 35S::SAP11<sub>MBSP</sub> *A. thaliana* plants  
490 were quantified in mature leaves of three independent, 5-week-old plants. Total RNAs were  
491 extracted from 100 mg snap frozen *A. thaliana* leaves with TRI-reagent (Sigma Aldrich) and  
492 cDNA synthesis was performed from 0.5 µg total RNA using the M-MLV-reverse  
493 transcriptase (Invitrogen). cDNA was subjected to qRT-PCR using SYBR® Green  
494 JumpStart<sup>TM</sup> Taq ReadyMix<sup>TM</sup> (Sigma-Aldrich) in a CFX96 Touch<sup>TM</sup> Real-Time PCR  
495 Detection System (Biorad) using gene-specific primers for the SAP11-homologs and Actin 2  
496 (AT3G18780) (S9 Table).

497

## 498 **Root length measurements**

499 *A. thaliana* seeds were sterilized in 5% sodium hypochlorite for 8 minutes and washed  
500 five times with sterile water. Seeds were germinated on ½ x MS medium with 0.8% (w/v)  
501 agar. Three days after germination, seedlings were transferred to ½ x Hoagland medium [70]  
502 with 0.25 mM KH<sub>2</sub>PO<sub>4</sub> containing 1% (w/v) sucrose and 1% (w/v) agar [41]. Plates were  
503 placed vertical to allow root growth on the agar surface. After an additional growth period of  
504 10 days seedlings were removed from the plates individually and their root length measured  
505 using a ruler.

506

## 507 **Generation and analysis of transgenic maize lines**

508 Codon optimized versions of the *SAP11<sub>AYWB</sub>* and the *SAP11<sub>MBSP</sub>* sequences without  
509 sequences corresponding to the signal peptide including a sequence encoding an N-terminal  
510 3xFLAG-tag were synthesized with flanking BamHI and EcoRI restriction sites (S10 Table)  
511 that were used for cloning into the multiple cloning site of the p1u Vector (DNA Cloning  
512 Service, Hamburg, Germany). The resulting *Ubi::FLAG-SAP11-nos* cassette was transferred  
513 from p1U into the binary Vector p7i (DNA Cloning Service, Hamburg, Germany) via SfiI  
514 restriction sites. Agrobacterium-mediated transformation of maize HiIIAxHiIIB embryos was  
515 performed by Crop Genetic Systems (CGS) UG (Hamburg, Germany). T<sub>0</sub> transgenic  
516 HiIIAxHiIIB plants were selected with BASTA (Bayer CropScience, Monheim, Germany).  
517 For seed reproduction T<sub>0</sub> transgenic plants were crossed with HiIIA plants because the  
518 described defects in sexual organs development (Fig. 5) impeded self-pollination. Plants were  
519 analyzed for production of proteins from transgenes via western blot hybridizations  
520 (explained above) with anti-FLAG M2 monoclonal primary antibody (Sigma-Aldrich, order  
521 number: F3165, diluted 1:1000) and anti-mouse-HRP secondary antibody (Sigma-Aldrich,  
522 diluted 1:10000) and then used for experiments.

523

## 524 **Insect fecundity assays**

525       Plants were grown under controlled environmental conditions with a 14h, 22 C°/ 10h,  
526 20°C light / dark period for Arabidopsis and 16h, 26°C/ 8h, 20°C light/dark period for maize.  
527 Seven-week-old Arabidopsis and three-week-old maize plants were individually exposed to  
528 10-15 adult *M. quadrilineatus* or *D. maidis* insects (7-10 females and 3-5 males) for 3 days.  
529 The insects were removed and progeny (nymphs or adults) were counted four weeks later.

530

## 531 **RNA-seq analysis**

532       Fully expanded leaves of seven-week-old *A. thaliana* Col-0 wt and transgenic plants  
533 were exposed to five adult *M. quadrilineatus* (2 males and 3 females) in a single clip cage  
534 with one clip-cage per plant. For the generation of non-treated samples, clip-cages were  
535 applied without insects. After 48h the areas covered by the clip-cages were harvested, snap  
536 frozen in liquid nitrogen and stored at -80C until further processing for RNA extraction. For  
537 maize, complete three-week-old maize HiIIA wild type (WT) or transgenic plants were  
538 exposed to 50 adult *M. quadrilineatus* or *D. maidis* insects (20 males and 30 females) for 48  
539 hours and the complete above soil plant material was harvested, snap frozen in liquid  
540 nitrogen and stored at -80C until further processing for RNA extraction.

541       Total RNA was extracted from ground Arabidopsis leaf tissue and from 200 mg ground  
542 maize material using the RNeasy plant mini kit with on-column DNase digestion (Qiagen).  
543 The RNA-seq data of the *A. thaliana* experiments were generated at Academia Sinica  
544 (Taipei, Taiwan) and at the Earlham Institute (EI, Norwich, UK). The RNA-seq data of all  
545 maize experiments were generated at EI. At Academia Sinica, libraries were generated with  
546 the Illumina Truseq strand-specific mRNA library preparation without size selection, and  
547 sequenced on the Illumina HiSeq2500, 125-bp paired-end reads (YOURGENE Bioscience,

548 New Taipei City, Taiwan). Libraries at EI were generated using NEXTflex directional RNA  
549 library (HT) preparation (Perkin Elmer, Austin, Texas, USA) and sequencing was done on  
550 the Illumina HiSeq4000, 75-bp paired-end reads (EI). To assess if the RNA-seq data for the  
551 *A. thaliana* experiments received from EI and Academia Sinica are comparable, four samples  
552 were sequenced at both facilities. Principal Component Analysis (PCA) showed that the  
553 samples generated by these two facilities cluster together demonstrating that batch effects are  
554 negligible (S6 Fig.).

555 The adapter sequences of the raw RNAseq reads were removed using Trim Galore,  
556 version 0.4.4 ([https://www.bioinformatics.babraham.ac.uk/projects/trim\\_galore/](https://www.bioinformatics.babraham.ac.uk/projects/trim_galore/)). The paired-  
557 end reads were aligned to the reference genome (*A. thaliana*/TAIR 10.23 and *Z.*  
558 *mays*/AGPv4) with the software TopHat, version 2.1.1 [71]. The number of aligned reads per  
559 gene was calculated using HTSeq, version 0.6.1 [72], and data were initially analysed via  
560 PCA, using the R/Bioconductor package DESeq2 [73]. Obvious outliers were excluded from  
561 the analysis; this amounted to one sample per experiment, as follows: one wild type (WT)  
562 Col-0 + *M. quadrilineatus* sample from the *A. thaliana* experiment; one *Ubi::FLAG-*  
563 *SAP11<sub>AYWB</sub>* + *M. quadrilineatus* sample from one of the maize experiments; one *Ubi::FLAG-*  
564 *SAP11<sub>AYWB</sub>* + *D. maidis* sample from the other maize experiment; and one *Ubi::FLAG-*  
565 *SAP11<sub>MBSP</sub>* sample in common with both experiments (S7 Fig., S1, S5, S6 Tables).  
566 Differential expression analysis was conducted with DESeq2, using the function `-contrast-` to  
567 make specific comparisons. For further analyses we selected genes that satisfy 3 criteria: *p*  
568 value <0.05 after accounting for a 5% false discovery rate (FDR) (Benjamini-Hochberg  
569 corrected), mean gene expression value >10 and fold change in expression >2. Cluster  
570 analysis was performed on z-score normalized data using the hierarchical method [74].

571

572 **Transcriptome assemblies of *M. quadrilineatus* and *D. maidis* RNA-seq data**

573 RNA-seq data of *M. quadrilineatus* and *D. maidis* males and females (~25 million  
574 reads each) were downloaded from NCBI, accession number SRP093182 and SRP093180  
575 respectively. The reads were used for *de novo* assemblies of male and female transcriptomes  
576 separately. Reads were trimmed to remove adaptor sequence and low-quality reads using  
577 Trim Galore ([https://www.bioinformatics.babraham.ac.uk/projects/trim\\_galore/](https://www.bioinformatics.babraham.ac.uk/projects/trim_galore/)). Reads over  
578 20-bp in length were retained for downstream analysis. Trimmed reads were *de novo*  
579 assembled using Trinity r20140717 [75] allowing a minimum contig length of 200 bp and  
580 minimum k-mer coverage of 2 with default parameters. Assembled contigs were made non-  
581 redundant and lowly expressed contigs were filtered with FPKM cut-off 1 using build-in Perl  
582 script provided by Trinity. This resulted in 48474 transcripts for male *M. quadrilineatus*,  
583 44409 transcripts for female *M. quadrilineatus*, 42815 transcripts for male *D. maidis* and  
584 59131 transcripts for female *D. maidis*. These assemblies were used to validate the origin of  
585 RNA-seq data by assessing if reads aligning to leafhopper transcripts were present in RNA-  
586 seq data derived from plants exposed to the leafhoppers as opposed to those of plants that  
587 were not exposed to the leafhoppers.

588

## 589 **Acknowledgments**

590 We acknowledge Dr. Idan Efroni (Department of Plant Sciences, Weizmann Institute of  
591 Science, Rehovot, Israel) for providing seeds for the *35S::miR319a x 35S::miR3TCP*  
592 *Arabidopsis* Col-0 line [30], Dr. Pilar Cubas (Department of Plant Molecular Genetics,  
593 Centro Nacional de Biotecnología, Madrid, Spain) for seeds of the *brc1 brc2* *Arabidopsis*  
594 Col-0 line [34], Dr. Ali Al-Subhi and Prof. Abdullah Al-Saadi (Department of Crop Sciences,  
595 Sultan Qaboos University, Muscat, Oman) for assistance with yeast two-hybrid experiments.  
596 We thank Dr. Ian Bedford, Anna Jordan, Gavin Hatt and Jake Stone from the JIC entomology  
597 team for insect rearing, and Andrew Davis for photography. We also thank Dr. Dirk Becker



598 (Crop Genetic Systems, Hamburg, Germany) for providing maize HiIIA seeds and Dr. Dirk  
599 Becker and Dr. Uta Paszkovski (Department of Plant Sciences, University of Cambridge,  
600 Cambridge, UK) for sharing their expertise in maize cultivation. For revision of the  
601 manuscript we thank Prof. Richard Immink.

602

## 603 **References**

- 604 1. Weisburg WG, Tully JG, Rose DL, Petzel JP, Oyaizu H, Yang D, *et al.* A  
605 phylogenetic analysis of the mycoplasmas: basis for their classification. *Journal of*  
606 *Bacteriology*. 1989;171(12):6455-67.
- 607 2. Gundersen DE, Lee IM, Rehner SA, Davis RE, Kingsbury DT. Phylogeny of  
608 mycoplasma-like organisms (Phytoplasmas): a basis for their classification. *Journal of*  
609 *Bacteriology*. 1994;176(17):5244-54.
- 610 3. Lee IM, Davis RE, Gundersen-Rindal DE. Phytoplasma: phytopathogenic mollicutes.  
611 *Annu Rev Microbiol*. 2000;54:221-55.
- 612 4. Weintraub PG, Beanland L. Insect vectors of phytoplasmas. *Annu Rev Entomol*.  
613 2006;51:91-111.
- 614 5. Bertaccini A. Phytoplasmas: diversity, taxonomy, and epidemiology. *Front Biosci*.  
615 2007;12:673-89.
- 616 6. Hogenhout SA, Oshima K, Ammar el D, Kakizawa S, Kingdom HN, Namba S.  
617 Phytoplasmas: bacteria that manipulate plants and insects. *Mol Plant Pathol*.  
618 2008;9(4):403-23.
- 619 7. Sugio A, MacLean AM, Kingdom HN, Grieve VM, Manimekalai R, Hogenhout SA.  
620 Diverse targets of phytoplasma effectors: from plant development to defense against  
621 insects. *Annu Rev Phytopathol*. 2011;49:175-95.

- 622 8. Sugio A, Kingdom HN, MacLean AM, Grieve VM, Hogenhout SA. Phytoplasma  
623 protein effector SAP11 enhances insect vector reproduction by manipulating plant  
624 development and defense hormone biosynthesis. *Proc Natl Acad Sci U S A*.  
625 2011;108(48):E1254-63.
- 626 9. MacLean AM, Orlovskis Z, Kowitwanich K, Zdziarska AM, Angenent GC, Immink  
627 RG, *et al.* Phytoplasma effector SAP54 hijacks plant reproduction by degrading  
628 MADS-box proteins and promotes insect colonization in a RAD23-dependent  
629 manner. *PLoS Biol*. 2014;12(4):e1001835.
- 630 10. Kitazawa Y, Iwabuchi N, Himeno M, Sasano M, Koinuma H, Nijo T, *et al.*  
631 Phytoplasma-conserved phylogen proteins induce phyllody across the Plantae by  
632 degrading floral MADS domain proteins. *J Exp Bot*. 2017;68(11):2799-811.
- 633 11. Sugio A, MacLean AM, Hogenhout SA. The small phytoplasma virulence effector  
634 SAP11 contains distinct domains required for nuclear targeting and CIN-TCP binding  
635 and destabilization. *New Phytol*. 2014;202(3):838-48.
- 636 12. MacLean AM, Sugio A, Makarova OV, Findlay KC, Grieve VM, Toth R, *et al.*  
637 Phytoplasma effector SAP54 induces indeterminate leaf-like flower development in  
638 *Arabidopsis* plants. *Plant Physiol*. 2011;157(2):831-41.
- 639 13. Orlovskis Z, Hogenhout SA. A bacterial parasite effector mediates insect vector  
640 attraction in host plants independently of developmental changes. *Front Plant Sci*.  
641 2016;7:885.
- 642 14. Janik K, Mithofer A, Raffener M, Stellmach H, Hause B, Schlink K. An effector of  
643 apple proliferation phytoplasma targets TCP transcription factors-a generalized  
644 virulence strategy of phytoplasma? *Mol Plant Pathol*. 2017;18(3):435-42.

- 645 15. Chang SH, Tan CM, Wu CT, Lin TH, Jiang SY, Liu RC, *et al.* Alterations of plant  
646 architecture and phase transition by the phytoplasma virulence factor SAP11. *J Exp*  
647 *Bot.* 2018;69(22):5389-401.
- 648 16. Wang N, Yang H, Yin Z, Liu W, Sun L, Wu Y. Phytoplasma effector SWP1 induces  
649 witches' broom symptom by destabilizing the TCP transcription factor BRANCHED1.  
650 *Mol Plant Pathol.* 2018;19(12):2623-34.
- 651 17. Bai X, Zhang J, Ewing A, Miller SA, Radek AJ, Shevchenko DV, *et al.* Living with  
652 genome instability: the adaptation of phytoplasmas to diverse environments of their  
653 insect and plant hosts. *J Bacteriol.* 2006;188(10):3682-96.
- 654 18. Toruño TY, Music MS, Simi S, Nicolaisen M, Hogenhout SA. Phytoplasma PMU1  
655 exists as linear chromosomal and circular extrachromosomal elements and has  
656 enhanced expression in insect vectors compared with plant hosts. *Mol Microbiol.*  
657 2010;77(6):1406-15.
- 658 19. Chung WC, Chen LL, Lo WS, Lin CP, Kuo CH. Comparative analysis of the peanut  
659 witches'-broom phytoplasma genome reveals horizontal transfer of potential mobile  
660 units and effectors. *PLoS One.* 2013;8(4):e62770.
- 661 20. Ku C, Lo WS, Kuo CH. Horizontal transfer of potential mobile units in phytoplasmas.  
662 *Mob Genet Elements.* 2013;3(5):e26145.
- 663 21. Lee IM, Gundersen-Rindal DE, Davis RE, Bottner KD, Marcone C, Seemuller E.  
664 '*Candidatus* Phytoplasma asteris', a novel phytoplasma taxon associated with aster  
665 yellows and related diseases. *Int J Syst Evol Microbiol.* 2004;54(Pt 4):1037-48.
- 666 22. Sugio A, Hogenhout SA. The genome biology of phytoplasma: modulators of plants  
667 and insects. *Curr Opin Microbiol.* 2012;15(3):247-54.

- 668 23. Nault LR, Delong DM. Evidence for co-evolution of leafhoppers in the genus  
669 *Dalbulus* (*Cicadellidae: Homoptera*) with maize and its ancestors. *Annals of the*  
670 *Entomological Society of America*. 1980;73(4):349-53.
- 671 24. Gonzalez JG, Jaramillo MG, Lopes JRS. Undetected infection by maize bushy stunt  
672 phytoplasma enhances host-plant preference to *Dalbulus maidis* (*Hemiptera:*  
673 *Cicadellidae*). *Environmental entomology*. 2018;47(2):396-402.
- 674 25. Navaud O, Dabos P, Carnus E, Tremousaygue D, Herve C. TCP transcription factors  
675 predate the emergence of land plants. *J Mol Evol*. 2007;65(1):23-33.
- 676 26. Cubas P, Lauter N, Doebley J, Coen E. The TCP domain: a motif found in proteins  
677 regulating plant growth and development. *The Plant journal : for cell and molecular*  
678 *biology*. 1999;18(2):215-22.
- 679 27. Aggarwal P, Das Gupta M, Joseph AP, Chatterjee N, Srinivasan N, Nath U.  
680 Identification of specific DNA binding residues in the TCP family of transcription  
681 factors in *Arabidopsis*. *Plant Cell*. 2010;22(4):1174-89.
- 682 28. Martin-Trillo M, Cubas P. TCP genes: a family snapshot ten years later. *Trends Plant*  
683 *Sci*. 2009;15(1):31-9.
- 684 29. Howarth DG, Donoghue MJ. Duplications in *Cys*-like genes from *Dipsacales*  
685 correlate with floral form. *Int J Plant Sci*. 2005;166(3):357-70.
- 686 30. Efroni I, Blum E, Goldshmidt A, Eshed Y. A protracted and dynamic maturation  
687 schedule underlies *Arabidopsis* leaf development. *Plant Cell*. 2008;20(9):2293-306.
- 688 31. Schommer C, Debernardi JM, Bresso EG, Rodriguez RE, Palatnik JF. Repression of  
689 cell proliferation by miR319-regulated TCP4. *Mol Plant*. 2014;7(10):1533-44.
- 690 32. Nicolas M, Cubas P. The role of TCP transcription factors in shaping flower structure,  
691 leaf morphology, and plant architecture. 2015:249-67.

- 692 33. Vadde BVL, Challa KR, Nath U. The TCP4 transcription factor regulates trichome  
693 cell differentiation by directly activating GLABROUS INFLORESCENCE STEMS in  
694 *Arabidopsis thaliana*. The Plant journal : for cell and molecular biology.  
695 2018;93(2):259-69.
- 696 34. Aguilar-Martinez JA, Poza-Carrion C, Cubas P. Arabidopsis BRANCHED1 acts as an  
697 integrator of branching signals within axillary buds. Plant Cell. 2007;19(2):458-72.
- 698 35. Koyama T, Furutani M, Tasaka M, Ohme-Takagi M. TCP transcription factors  
699 control the morphology of shoot lateral organs via negative regulation of the  
700 expression of boundary-specific genes in Arabidopsis. Plant Cell. 2007;19(2):473-84.
- 701 36. Gonzalez-Grandio E, Poza-Carrion C, Sorzano CO, Cubas P. BRANCHED1  
702 promotes axillary bud dormancy in response to shade in Arabidopsis. Plant Cell.  
703 2013;25(3):834-50.
- 704 37. Yang Y, Nicolas M, Zhang J, Yu H, Guo D, Yuan R, *et al*. The TIE1 transcriptional  
705 repressor controls shoot branching by directly repressing BRANCHED1 in  
706 Arabidopsis. PLoS Genet. 2018;14(3):e1007296.
- 707 38. Luo D, Carpenter R, Copsey L, Vincent C, Clark J, Coen E. Control of organ  
708 asymmetry in flowers of *Antirrhinum*. Cell. 1999;99(4):367-76.
- 709 39. Doebley J., Stec A, Gustus C. *teosinte branched1* and the origin of maize: evidence  
710 for epistasis and the evolution of dominance. Genetics. 1995;141:333-46.
- 711 40. Studer AJ, Wang H, Doebley JF. Selection during maize domestication targeted a  
712 gene network controlling plant and inflorescence architecture. Genetics.  
713 2017;207(2):755-65.
- 714 41. Lu YT, Li MY, Cheng KT, Tan CM, Su LW, Lin WY, *et al*. Transgenic plants that  
715 express the phytoplasma effector SAP11 show altered phosphate starvation and  
716 defense responses. Plant Physiol. 2014;164(3):1456-69.

- 717 42. Burdo B, Gray J, Goetting-Minesky MP, Wittler B, Hunt M, Li T, *et al.* The Maize  
718 TFome--development of a transcription factor open reading frame collection for  
719 functional genomics. *The Plant journal : for cell and molecular biology.*  
720 2014;80(2):356-66.
- 721 43. Yilmaz A, Nishiyama MY, Jr., Fuentes BG, Souza GM, Janies D, Gray J, *et al.*  
722 GRASSIUS: a platform for comparative regulatory genomics across the grasses. *Plant*  
723 *Physiol.* 2009;149(1):171-80.
- 724 44. Bai F, Reinheimer R, Durantini D, Kellogg EA, Schmidt RJ. TCP transcription factor,  
725 BRANCH ANGLE DEFECTIVE 1 (BAD1), is required for normal tassel branch  
726 angle formation in maize. *Proc Natl Acad Sci U S A.* 2012;109(30):12225-30.
- 727 45. Chai W, Jiang P, Huang G, Jiang H, Li X. Identification and expression profiling  
728 analysis of TCP family genes involved in growth and development in maize. *Physiol*  
729 *Mol Biol Plants.* 2017;23(4):779-91.
- 730 46. Hubbard L, McSteen P, Doebley J, Hake S. Expression patterns and mutant  
731 phenotype of *teosinte branched1* correlate with growth suppression in maize and  
732 teosinte. *Genetics.* 2002;162(4):1927-35.
- 733 47. Brown PJ, Upadaya N, Mahone GS, Tian F, Bradbury PJ, Myles S, *et al.* Distinct  
734 genetic architectures for male and female inflorescence traits of maize. *PLoS Genet.*  
735 2011;7(11):e1002383.
- 736 48. Horn S, Pabón-Mora N, Theuß VS, Busch A, Zachgo S. Analysis of the CYC/TB1  
737 class of TCP transcription factors in basal angiosperms and magnoliids. *The Plant*  
738 *Journal.* 2014;81(4):559-71.
- 739 49. Finlayson SA. Arabidopsis TEOSINTE BRANCHED1-LIKE 1 regulates axillary bud  
740 outgrowth and is homologous to monocot TEOSINTE BRANCHED1. *Plant Cell*  
741 *Physiol.* 2007;48(5):667-77.

- 742 50. Dong Z, Li W, Unger-Wallace E, Yang J, Vollbrecht E, Chuck G. Ideal crop plant  
743 architecture is mediated by *tassels replace upper ears1*, a BTB/POZ ankyrin repeat  
744 gene directly targeted by TEOSINTE BRANCHED1. Proc Natl Acad Sci U S A.  
745 2017;114(41):E8656-e64.
- 746 51. Gonzalez-Grandio E, Pajoro A, Franco-Zorrilla JM, Tarancon C, Immink RG, Cubas  
747 P. Abscisic acid signaling is controlled by a BRANCHED1/HD-ZIP I cascade in  
748 Arabidopsis axillary buds. Proc Natl Acad Sci U S A. 2017;114(2):E245-E54.
- 749 52. Niwa M, Daimon Y, Kurotani K, Higo A, Pruneda-Paz JL, Breton G, *et al.*  
750 BRANCHED1 interacts with FLOWERING LOCUS T to repress the floral transition  
751 of the axillary meristems in Arabidopsis. Plant Cell. 2013;25(4):1228-42.
- 752 53. Niwa M, Endo M, Araki T. Florigen is involved in axillary bud development at  
753 multiple stages in Arabidopsis. Plant signaling & behavior. 2013;8(11):e27167.
- 754 54. Maejima K, Iwai R, Himeno M, Komatsu K, Kitazawa Y, Fujita N, *et al.* Recognition  
755 of floral homeotic MADS domain transcription factors by a phytoplasmal effector,  
756 phyllogen, induces phyllody. The Plant journal : for cell and molecular biology.  
757 2014;78(4):541-54.
- 758 55. Maejima K, Kitazawa Y, Tomomitsu T, Yusa A, Neriya Y, Himeno M, *et al.*  
759 Degradation of class E MADS-domain transcription factors in Arabidopsis by a  
760 phytoplasmal effector, phyllogen. Plant signaling & behavior. 2015;10(8):e1042635.
- 761 56. Orlovskis Z, Canale MC, Haryono M, Lopes JRS, Kuo CH, Hogenhout SA. A few  
762 sequence polymorphisms among isolates of Maize bushy stunt phytoplasma associate  
763 with organ proliferation symptoms of infected maize plants. Ann Bot.  
764 2017;119(5):869-84.
- 765 57. Palatnik JF, Edwards A, Wu X, Schommer C, Schwab R, Carrington JC, *et al.*  
766 Control of leaf morphogenesis by microRNAs. Nature. 2003;425.

- 767 58. Schommer C, Palatnik JF, Aggarwal P, Chetelat A, Cubas P, Farmer EE, *et al.*  
768 Control of jasmonate biosynthesis and senescence by miR319 targets. PLoS Biol.  
769 2008;6(9):e230.
- 770 59. Sarvepalli K, Nath U. Hyper-activation of the TCP4 transcription factor in  
771 *Arabidopsis thaliana* accelerates multiple aspects of plant maturation. The Plant  
772 journal : for cell and molecular biology. 2011;67(4):595-607.
- 773 60. Danisman S, van der Wal F, Dhondt S, Waites R, de Folter S, Bimbo A, *et al.*  
774 *Arabidopsis* class I and class II TCP transcription factors regulate jasmonic acid  
775 metabolism and leaf development antagonistically. Plant Physiol. 2012;159(4):1511-  
776 23.
- 777 61. Zhang C, Ding Z, Wu K, Yang L, Li Y, Yang Z, *et al.* Suppression of Jasmonic Acid-  
778 Mediated Defense by Viral-Inducible MicroRNA319 Facilitates Virus Infection in  
779 Rice. Mol Plant. 2016;9(9):1302-14.
- 780 62. Yang L, Teixeira PJ, Biswas S, Finkel OM, He Y, Salas-Gonzalez I, *et al.*  
781 *Pseudomonas syringae* type III effector HopBB1 promotes host transcriptional  
782 repressor degradation to regulate phytohormone responses and virulence. Cell Host  
783 Microbe. 2017;21(2):156-68.
- 784 63. Jiao Y, Lee YK, Gladman N, Chopra R, Christensen SA, Regulski M, *et al.* MSD1  
785 regulates pedicellate spikelet fertility in sorghum through the jasmonic acid pathway.  
786 Nat Commun. 2018;9(1):822.
- 787 64. Nakagawa T, Ishiguro S, Kimura T. Gateway vectors for plant transformation. Plant  
788 Biotech. 2009:275-84.
- 789 65. Grefen C, Donald N, Hashimoto K, Kudla J, Schumacher K, Blatt MR. A ubiquitin-  
790 10 promoter-based vector set for fluorescent protein tagging facilitates temporal



- 791 stability and native protein distribution in transient and stable expression studies. The  
792 Plant journal : for cell and molecular biology. 2010;64(2):355-65.
- 793 66. Yoo SD, Cho YH, Sheen J. Arabidopsis mesophyll protoplasts: a versatile cell system  
794 for transient gene expression analysis. Nat Protoc. 2007;2(7):1565-72.
- 795 67. Rossignol P, Collier S, Bush M, Shaw P, Doonan JH. Arabidopsis POT1A interacts  
796 with TERT-V(I8), an N-terminal splicing variant of telomerase. J Cell Sci.  
797 2007;120(Pt 20):3678-87.
- 798 68. Pecher P, Eschen-Lippold L, Herklotz S, Kuhle K, Naumann K, Bethke G, *et al.* The  
799 *Arabidopsis thaliana* mitogen-activated protein kinases MPK3 and MPK6 target a  
800 subclass of 'VQ-motif'-containing proteins to regulate immune responses. New  
801 Phytol. 2014;203(2):592-606.
- 802 69. Logemann E, Birkenbihl RP, Ulker B, Somssich IE. An improved method for  
803 preparing *Agrobacterium* cells that simplifies the *Arabidopsis* transformation  
804 protocol. Plant Methods. 2006;2:16.
- 805 70. Hoagland DR, Arnon DI. The water-culture method for growing plants without soil.  
806 California Agri- cultural Experimental Station Circular 1950;347:1-39.
- 807 71. Kim D, Pertea G, Trapnell C, Pimentel H, Kelley R, Salzberg SL. TopHat2: accurate  
808 alignment of transcriptomes in the presence of insertions, deletions and gene fusions.  
809 Genome biology. 2013;14(4):R36.
- 810 72. Anders S, Pyl PT, Huber W. HTSeq--a Python framework to work with high-  
811 throughput sequencing data. Bioinformatics (Oxford, England). 2015;31(2):166-9.
- 812 73. Love MI, Huber W, Anders S. Moderated estimation of fold change and dispersion  
813 for RNA-seq data with DESeq2. Genome biology. 2014;15(12):550.
- 814 74. Murtagh F, Legendre P. Ward's hierarchical agglomerative clustering method : which  
815 algorithms implement Ward's criterion? Journal of Classification. 2014;31:274-95.

816 75. Grabherr MG, Haas BJ, Yassour M, Levin JZ, Thompson DA, Amit I, *et al.* Full-  
817 length transcriptome assembly from RNA-Seq data without a reference genome.  
818 Nature biotechnology. 2011;29(7):644-52.

819

## 820 **Figure Captions**

821 **Fig. 1. SAP11<sub>AYWB</sub> and SAP11<sub>MBSP</sub> interactions with *A. thaliana* TCP transcription**

822 **factors.** (A) Western blots of *A. thaliana* protoplast destabilization assays; SAP11<sub>AYWB</sub> and

823 SAP11<sub>MBSP</sub> destabilize the CYC/TB1 TCPs BRC1 (AtTCP18) and BRC2 (AtTCP12) and

824 SAP11<sub>AYWB</sub> also all class II CIN-TCPs, whereas the SAP11 homologs did not destabilize

825 class I TCPs. GFP-tagged SAP11 (filled arrowheads) or GFP alone (open arrowheads) and

826 HA-tagged TCPs were detected with specific antibodies to GFP and HA, respectively, as

827 indicated at left of the blots. \*band of the correct size in case of multiple bands on the blots.

828 Loading controls: Amidoblack-stained large RUBISCO subunit. (B) Yeast two-hybrid assays

829 of interactions of SAP11<sub>AYWB</sub> with CIN and CYC/TB1-TCPs and SAP11<sub>MBSP</sub> with

830 CYC/TB1-TCPs. Positive interactions are visible by yeast growth on SD-LWH selection

831 media containing 20 mM 3-Amino-1,2,4-triazole (3AT). EV=empty vector controls showing

832 absence of auto activations. (C) qRT-PCRs of transcripts of *SAP11<sub>AYWB</sub>* and *SAP11<sub>MBSP</sub>*

833 transgenes in *A. thaliana* lines shown in D-F. \*p<0.01, students t-test compared to Col-0,

834 n=3. (D-G) *35S::SAP11<sub>AYWB</sub>* stable transgenic *A. thaliana* (Col-0) lines phenocopy both the

835 *A. thaliana brcl-2 brc2-1 (brcl brc2)* double (Col-0) mutant and *35S::miR319a x*

836 *35S::miR3TCP* stable transgenic *A. thaliana* (Col-0) lines and *35S::SAP11<sub>MBSP</sub>* transgenic

837 lines phenocopy only the *A. thaliana brcl brc2* mutant. Nine-week-old plants were

838 phenotyped for rosette leaf morphology (D), overall appearance of side views (E), rosette

839 diameters (F) and numbers of primary branches emerging from the rosettes (G). (F, G) Error

840 bars denote standard errors (n=24). Letters indicate groups that are statistically different (one-  
841 way ANOVA with Tukey's Multiple Comparison Test).

842

843 **Fig. 2. SAP11 binding specificity to regions within the TCP domains of *A. thaliana***

844 **TCP2 (CIN-TCP) and TCP18 (CYC/TB1-TCP BRC1).** (A) Aligned amino acid sequences

845 of the TCP domains of TCP2 and TCP18 with boxed basic and helix-loop-helix domains.

846 (B) Binding specificity of SAP11<sub>MBSP</sub> requires the complete TCP18 helix-loop-helix domain.

847 Schematic representation at left are the 59-amino-acid TCP2 and TCP18 TCP domain

848 chimeras and AtTCP2 and AtTCP18 wildtype TCP domains tested for SAP11<sub>AYWB</sub> or

849 SAP11<sub>MBSP</sub> binding in yeast two-hybrid analysis at right, as described in the Fig. 1 legend.

850

851 **Fig. 3 Analyses of the impact of phytoplasma SAP11<sub>AYWB</sub> and SAP11<sub>MBSP</sub> effectors on**

852 ***A. thaliana* susceptibility to the AY-WB insect vector *M. quadrilineatus*.** (A) SAP11<sub>AYWB</sub>

853 promotes *M. quadrilineatus* nymph production on *A. thaliana*, whereas SAP11<sub>MBSP</sub> does not.

854 Error bars denote standard errors, \*p<0.01, students t-test compared to Col-0, n=3.

855 (B) Principal component analysis (PCA) on the matrix of normalized read counts of 6

856 treatments (n=3-4, see S1 Table) showing that SAP11<sub>AYWB</sub> modulates plant responses to

857 *M. quadrilineatus* (+Mq) differently compared to SAP11<sub>MBSP</sub> and wt *A. thaliana* (Col-0).

858 (C, D) Volcano plots showing differentially expressed genes (DEGs) in insect exposed

859 Sap11<sub>AYWP</sub> and SAP11<sub>MBSP</sub>. DEGs with potential relevance in SAP11 dependent response

860 (red dots) to *M. quadrilineatus* were selected by three criteria (i) P value > 0.05 (red and blue

861 dots), (ii) average read count > 10 (dashed horizontal line) and (iii) log2 fold change > 1

862 (dashed vertical lines). (E) SAP11<sub>AYWB</sub> modulates plant defence responses to

863 *M. quadrilineatus* relatively to Col-0, unlike SAP11<sub>MBSP</sub>. Hierarchical clustering based on

864 normalized read counts of 96 selected DEGs (red dots in C). See S2 Table for normalized

865 read count values of all treatments and S3 Table for gene annotations with 30 genes known to  
866 be involved in defence highlighted in yellow. All experiments were executed with  
867 *35S::SAP11<sub>AYWB</sub>* line 7 [8] and *35S::SAP11<sub>MBSP</sub>* line 1 (this work).

868

869 **Fig. 4 Classification of *Z. mays* (Zm) TCPs.** The TCP motifs identified in 44 ZmTCPs  
870 (<http://grassius.org/grasstfdb.html>) were aligned with subgroup specific TCPs from *Oryza*  
871 *sativa* (Os) OsPCF1/2, *Antirrhinummajus* CINCINNATA (AmCIN) and CYCLOIDEA  
872 (AmCYC) and *Z. mays* TEOSINTE BRANCHED1 (ZmTCP02/TB1) (CYC/TB1 green).  
873 A number of proteins carry truncated TCP motifs at their N- or C-terminus (ZmTCP04,  
874 ZmTCP06, ZmTCP12, ZmTCP14, ZmTCP20, ZmTCP42 and ZmTCP44) or incomplete  
875 versions of the TCP-motif within their amino acid sequence (ZmTCP07, ZmTCP28,  
876 ZmTCP43). The ZmTCPs were assigned to the (sub)groups based on amino acid  
877 conservations (Class I, yellow; Class II, blue; CIN, red and CYC/TB1, green with AmCYC-  
878 like TCPs in purple and TB1-like TCPs in orange) [28] A new CII subgroup shares sequence  
879 homology with CIN-TCPs and CYC/TB1-TCPs. Asterisks indicate TCPs with potential  
880 miR319a target sites identified in their coding gene sequences (S5 Fig.).

881

882 **Fig. 5 SAP11<sub>AYWB</sub> and SAP11<sub>MBSP</sub> interactions with maize TCP transcription factors**  
883 **(ZmTCPs).** (A) SAP11<sub>AYWB</sub> interacts with ZmTCPs of the three Class II subgroups and  
884 SAP11<sub>MBSP</sub> with CYC/TB1 ZmTCPs in yeast two-hybrid (Y2H) experiments. Y2H  
885 experiments were executed with full-length ZmTCP proteins, except ZmTCP09 for which the  
886 DNA sequence corresponding to the 59 amino-acid of the TCP-motif was synthesized  
887 (Genscript). (B) SAP11<sub>AYWB</sub> and SAP11<sub>MBSP</sub> destabilize ZmTCPs inside maize protoplasts.  
888 Immunoblots show detection of GFP-tagged SAP11 (filled arrowheads) or GFP alone (open  
889 arrowheads) and HA-tagged TCPs with specific antibodies to GFP and HA, respectively, as

890 indicated at left of the blots. Loading control: amidoblack staining of the large RUBISCO  
891 subunit. (C) For phenotyping FLAG-SAP11<sub>AYWB</sub> (lane 1) and FLAG-SAP11<sub>MBSP</sub> (lane 2)  
892 were detected in plants of the heterozygous transgenic Ubi::FLAG-SAP11<sub>AYWB</sub>1 and  
893 Ubi::FLAG-SAP11<sub>MBSP</sub>1 maize lines. The immunoblots shown were probed with anti-flag  
894 antibodies. (D) Severe developmental phenotypes of *Ubi::FLAG-SAP11<sub>AYWB</sub>* (HiIIA) and  
895 *Ubi::FLAG-SAP11<sub>MBSP</sub>* (HiIIA) transgenic maize plants. Phenotyping was done on 13-week-  
896 old transgenic and WT HiIIA plants; for each transgenic Ubi::FLAG-SAP11 maize line 3  
897 plants were analysed and photos of one representative plant are shown. (a-c) Both *SAP11*  
898 transgenic lines are shorter and produce more tillers surrounding the main culm compared to  
899 WT HiIIA and *SAP11<sub>MBSP</sub>* lines also produced more axillary branches. (d-f) Crinkling of leaf  
900 edges at the base of only the *SAP11<sub>AYWB</sub>* lines. (g-i and insets 1-3) Impaired female  
901 inflorescence development of both *SAP11* transgenic lines. Red silk like structures emerged  
902 from the leaf sheath in the *SAP11<sub>AYWB</sub>* line (h, inset 2) whereas long axillary branches tipped  
903 by tassels emerged in the *SAP11<sub>MBSP</sub>* line (i, inset 3), compared to ears in WT HiIIA (g, inset  
904 1). *SAP11<sub>MBSP</sub>* plants produced fertile pollen from these tassels, but were female sterile. (j-l,  
905 insets 7-11) Impaired male inflorescence development of *SAP11* transgenic lines. *SAP11<sub>AYWB</sub>*  
906 lines developed feminized tassel, including the development of silks, at the tip of the main  
907 culm (k, inset 8) and at the tip of the tillers (k, inset 9). The tassel development of *SAP11<sub>MBSP</sub>*  
908 lines at the tip of the main culm (l, inset 10) and at the tip of tillers (l, inset 11) resembled  
909 those of WT HiIIA (j, inset 7). (E) Feminized tassels of *SAP11<sub>AYWB</sub>* lines are fertile.  
910 Pollination of feminized tassels (k, insets 8 and 9) with pollen from *SAP11<sub>MBSP</sub>* or WT plants  
911 produced kernels (m and n), which germinated (not shown). In addition, pollination of the  
912 silks emerging from the leaf sheath (h, inset 2) resulted in the development of naked ears,  
913 without husk leaves, emerging directly from the leaf sheath (o). The ears produced kernels

914 (o) that germinated (not shown). The *SAP11*<sub>MBSP</sub> lines did not produce pollen and therefore  
915 are male sterile.

916

917 **Fig. 6 Schematic presentation of phenotyping results of WT maize (*Z. mays*), *tb1* maize**  
918 **and *Ubi::FLAG-SAP11* maize plants.** Schematic presentations of the phenotypes of teosinte  
919 and *tb1* are included as comparison [39,46,47]. *tb1* resembles teosinte architecture but has  
920 impaired development of female inflorescences. *Ubi::FLAG-SAP11*<sub>MBSP</sub> plants phenocopy  
921 *tb1* plants. *Ubi::FLAG-SAP11*<sub>AYWB</sub> plants produce more tillers with female inflorescences and  
922 naked ears from the main culm, and are male sterile. Main culms are indicated in black,  
923 axillary branches in green, tillers in blue, silks directly emerging from the main culm in red,  
924 silks of ears in yellow and inflorescences in symbols (♂, male; ♀, female).

925

926 **Fig. 7 The phytoplasma *SAP11*<sub>AYWB</sub> and *SAP11*<sub>MBSP</sub> effectors do not modulate maize**  
927 **defences in response to exposure to AYWB and MBSP leafhopper vectors**  
928 ***M. quadrilineatus* and *D. maidis*, respectively.** (A, B) Numbers of nymphs produced from  
929 the two leafhopper species are similar among *SAP11* transgenic and WT maize lines.  
930 AYWB1, 2 and 3 and MBSP1 and 2 indicate independent transgenic lines. a above the error  
931 bars indicates no significant differences (one-way ANOVA with Tukey's Multiple  
932 Comparison Test, n=4). (C) *M. quadrilineatus* exposure (+Mq) similarly alters gene  
933 expression of *SAP11*<sub>AYWB</sub> and *SAP11*<sub>MBSP</sub> transgenic and WT maize lines. (D) Gene  
934 expression patterns of *D. maidis*-exposed (+Dm) transgenic and WT maize lines are similar  
935 to those of non-exposed lines. (C, D) Principal component analysis (PCA) on the matrix of  
936 normalized read counts of 6 treatments (n=3-4 per treatment, see S5 and S6 Tables). RNA-  
937 seq experiments were done with *Ubi::FLAG-SAP11*<sub>AYWB</sub> line 1 and *Ubi::FLAG-SAP11*<sub>MBSP</sub>  
938 line 1.

## 939 **Supporting information captions**

940 **S1 Fig. Phenotyping of transgenic *35S::SAP11<sub>AYWB</sub>* and *35S::SAP11<sub>MBSP</sub>* Arabidopsis**  
941 **plants.** Three independent lines overexpressing either *SAP11<sub>AYWB</sub>* or *SAP11<sub>MBSP</sub>* were  
942 analysed in comparison to Col-0, the *brc1 brc2* mutant and *35S::miR319a x 35S::miR3TCP*  
943 with regard to (A) the number of rosette leaves when first bolting buds appeared at the centre  
944 of the leaf rosette, (B) the time point of bolting buds appearance, (C) the plant height and  
945 (D) the number of primary cauline-leaf branches (CI). The number of primary rosette-leaf  
946 branches (RI) are presented in Fig. 1G of the main text. (E) Schematic presentation of  
947 Arabidopsis branching. Error bars denote standard errors (n=24). Asterisks indicate  
948 statistically significant differences compared to Col-0. (\*, p<0.05, \*\*, p<0.01, \*\*\*, p<0.001,  
949 student's t-test); ns, not significant.

950

951 **S2 Fig. CIN-TCP destabilization affects root lengths.** (A) Roots of representative  
952 *35S::SAP11<sub>AYWB</sub>* and *35S::SAP11<sub>MBSP</sub>* mutants compared to Col-0, the *brc1 brc2* mutant and  
953 *35S::miR319a x 35S::miR3TCP* lines. (B) Root length measurements of indicated mutants  
954 compared to Col-0. Error bars denote standard errors (n=20). Asterisks indicates statistically  
955 significant difference (\*, p<0.001, student's t-test); ns, not significant.

956

957 **S3 Fig. Classification of *Sorghum bicolor* (Sb) TCPs.** The TCP motifs of 27 SbTCPs  
958 (<http://grassius.org/grasstfdb.html>) were aligned and assigned to the TCP (sub)groups as  
959 described in Fig. 4. Corresponding gene codes are presented in S4 Table. SbTCP4 carries a  
960 truncated TCP-motif at its C-terminus and SbTCP10 and SbTCP23 carry incomplete versions  
961 of the TCP-motif within their amino acid sequence. Sequences were aligned using ClustalW  
962 (<http://www.genome.jp/tools/clustalw/>) and visualized using the Boxshade software

963 ([http://www.ch.embnet.org/software/BOX\\_form.html](http://www.ch.embnet.org/software/BOX_form.html)). Asterisks indicate TCPs with  
964 potential miR319a target sites identified in their coding gene sequences (S5 Fig.).

965

966 **S4 Fig. Classification of *Oryza sativa* (Oz) TCPs.** The TCP motifs of 27 OzTCPs  
967 (<http://grassius.org/grasstfdb.html>) were aligned and assigned to the TCP (sub)groups as  
968 described in Fig. 4. Corresponding gene codes are presented in S4 Table. Sequences were  
969 aligned using ClustalW (<http://www.genome.jp/tools/clustalw/>) and visualized using the  
970 Boxshade software ([http://www.ch.embnet.org/software/BOX\\_form.html](http://www.ch.embnet.org/software/BOX_form.html)). Asterisks indicate  
971 TCPs with potential miR319a target sites identified in their coding gene sequences (S5 Fig.).

972

973 **S5 Fig. Identification of potential miR319a target sites.** The CDS of the TCPs from *Zea*  
974 *mays* (Zm), *Oryza sativa* (Os), *Sorghum bicolor* (Sb), and of the *Antirrhinum majus* (Am)  
975 CIN-TCP were screened for potential miR319a target sites. They are depicted together with  
976 the miR319a binding sites of *Arabidopsis thaliana* (At) CIN-TCPs [57]. Nucleotides known  
977 to be involved in miR319a binding to AtCIN-TCPs are indicated in grey [57].

978

979 **S6 Fig. Principal component analysis (PCA) showing that samples sequenced at**  
980 **different facilities cluster together (batch effect is negligible).** PCA was conducted with  
981 normalized read counts of RNA-seq data obtained from *M. quadrilineatus*-exposed leaves of  
982 three *A. thaliana* Col-0 plants (samples #1, 2 and 3) and *35S::miR319a x 35S::miR3TCP*  
983 sample #4 generated at the Earlham Institute, Norwich, UK (red circles) and Academia  
984 Sinica, Taipei, Taiwan (green triangles).

985

986 **S7 Fig. Cluster analysis performed on the matrix of normalized read counts of RNA-seq**  
987 **values from (A) *Arabidopsis* Col-0, *35S::SAP11<sub>AYWB</sub>* and *35S::SAP11<sub>MBSP</sub>* non-exposed and**



988 exposed to *M. quadrilineatus* (+Mq). (B) *Z. mays* HiIIA, *Ubi::FLAG-SAP11<sub>AYWB</sub>* and  
989 *Ubi::FLAG-SAP11<sub>MBSP</sub>* non-exposed and exposed to *M. quadrilineatus* (+Mq) and (C) non-  
990 exposed and exposed to *D. maidis* (+Dm). Experiments were done with *35S::SAP11<sub>AYWB</sub>*  
991 line 7 (Sugio *et al.*, 2011b), *35S::SAP11<sub>MBSP</sub>* line 1, *Ubi::FLAG-SAP11<sub>AYWB</sub>* line 1 and  
992 *Ubi::FLAG-SAP11<sub>MBSP</sub>* line 1.

993

994 **S1 Table: Alignment to SAP11 transgene, *M. quadrilineatus* transcriptome and *A.***  
995 ***thaliana* genome of RNA-seq data shown in Fig. 3.** +Mq indicates samples from  
996 *M. quadrilineatus* exposed plants.

997

998 **S2 Table: List of differentially expressed genes and expression values in RNA-seq**  
999 **experiments of 6 treatments.** The genes are ordered according to the heat map in Fig 3E.  
1000 Genes potentially involved in plant defense response are highlighted in yellow and  
1001 annotations of these genes are listed in S3 Table. +Mq indicates samples from  
1002 *M. quadrilineatus* exposed plants.

1003

1004 **S3 Table: List of differentially expressed genes with potential biological functions.** The  
1005 genes are ordered according to the heat map in Fig 3E. Genes potentially involved in plant  
1006 defense response are highlighted in yellow.

1007

1008 **S4 Table: Sequence IDs of TCPs from *Zea mays* (Zm), *Arabidopsis thaliana* (At),**  
1009 ***Sorghum bicolor* (Sb) and *Oryza sativa* (Os).**

1010

1011 **S5 Table: Alignment to SAP11 transgene, *M. quadrilineatus* transcriptome and *Z. mays***  
1012 **genome of RNA-seq data of *M. quadrilineatus*-exposed (+Mq) *Z. mays* shown in Fig. 7.**

1013

1014 **S6 Table: Alignment to SAP11 transgene, *D. maidis* transcriptome and *Z. mays* genome**  
1015 **of RNA-seq data of *D. maidis*-exposed (+Dm) *Z. mays* shown in Fig. 7.**

1016

1017 **S7 Table. Oligonucleotide sequences (5' > 3') for cloning.**

1018

1019 **S8 Table. Synthesized CDS (underlined) flanked by gateway compatible attL1 and**  
1020 **attL2 sites.** Nucleotide sequences for gene syntheses of *SAP11<sub>MBSP</sub>* for expression in  
1021 *Arabidopsis thaliana* and of the TCP domains from *ZmTCP33*, *AtTCP2*, *AtTCP18* and  
1022 chimeras of *AtTCP2* and *AtTCP18* TCP domains for expression in yeast.

1023

1024 **S9 Table. Oligonucleotide sequences (5' > 3') for qRT-PCR.**

1025

1026 **S10 Table. Nucleotide sequences for gene syntheses of *FLAG-SAP11<sub>MBSP</sub>* and *FLAG-***  
1027 ***SAP11<sub>AYWB</sub>* for expression in *Zea mays*.** Kozak sequences are in italic, ORFs are flanked  
1028 by *Bam*HI and *Eco*R1 restriction sites (grey) for subsequent cloning.

1029

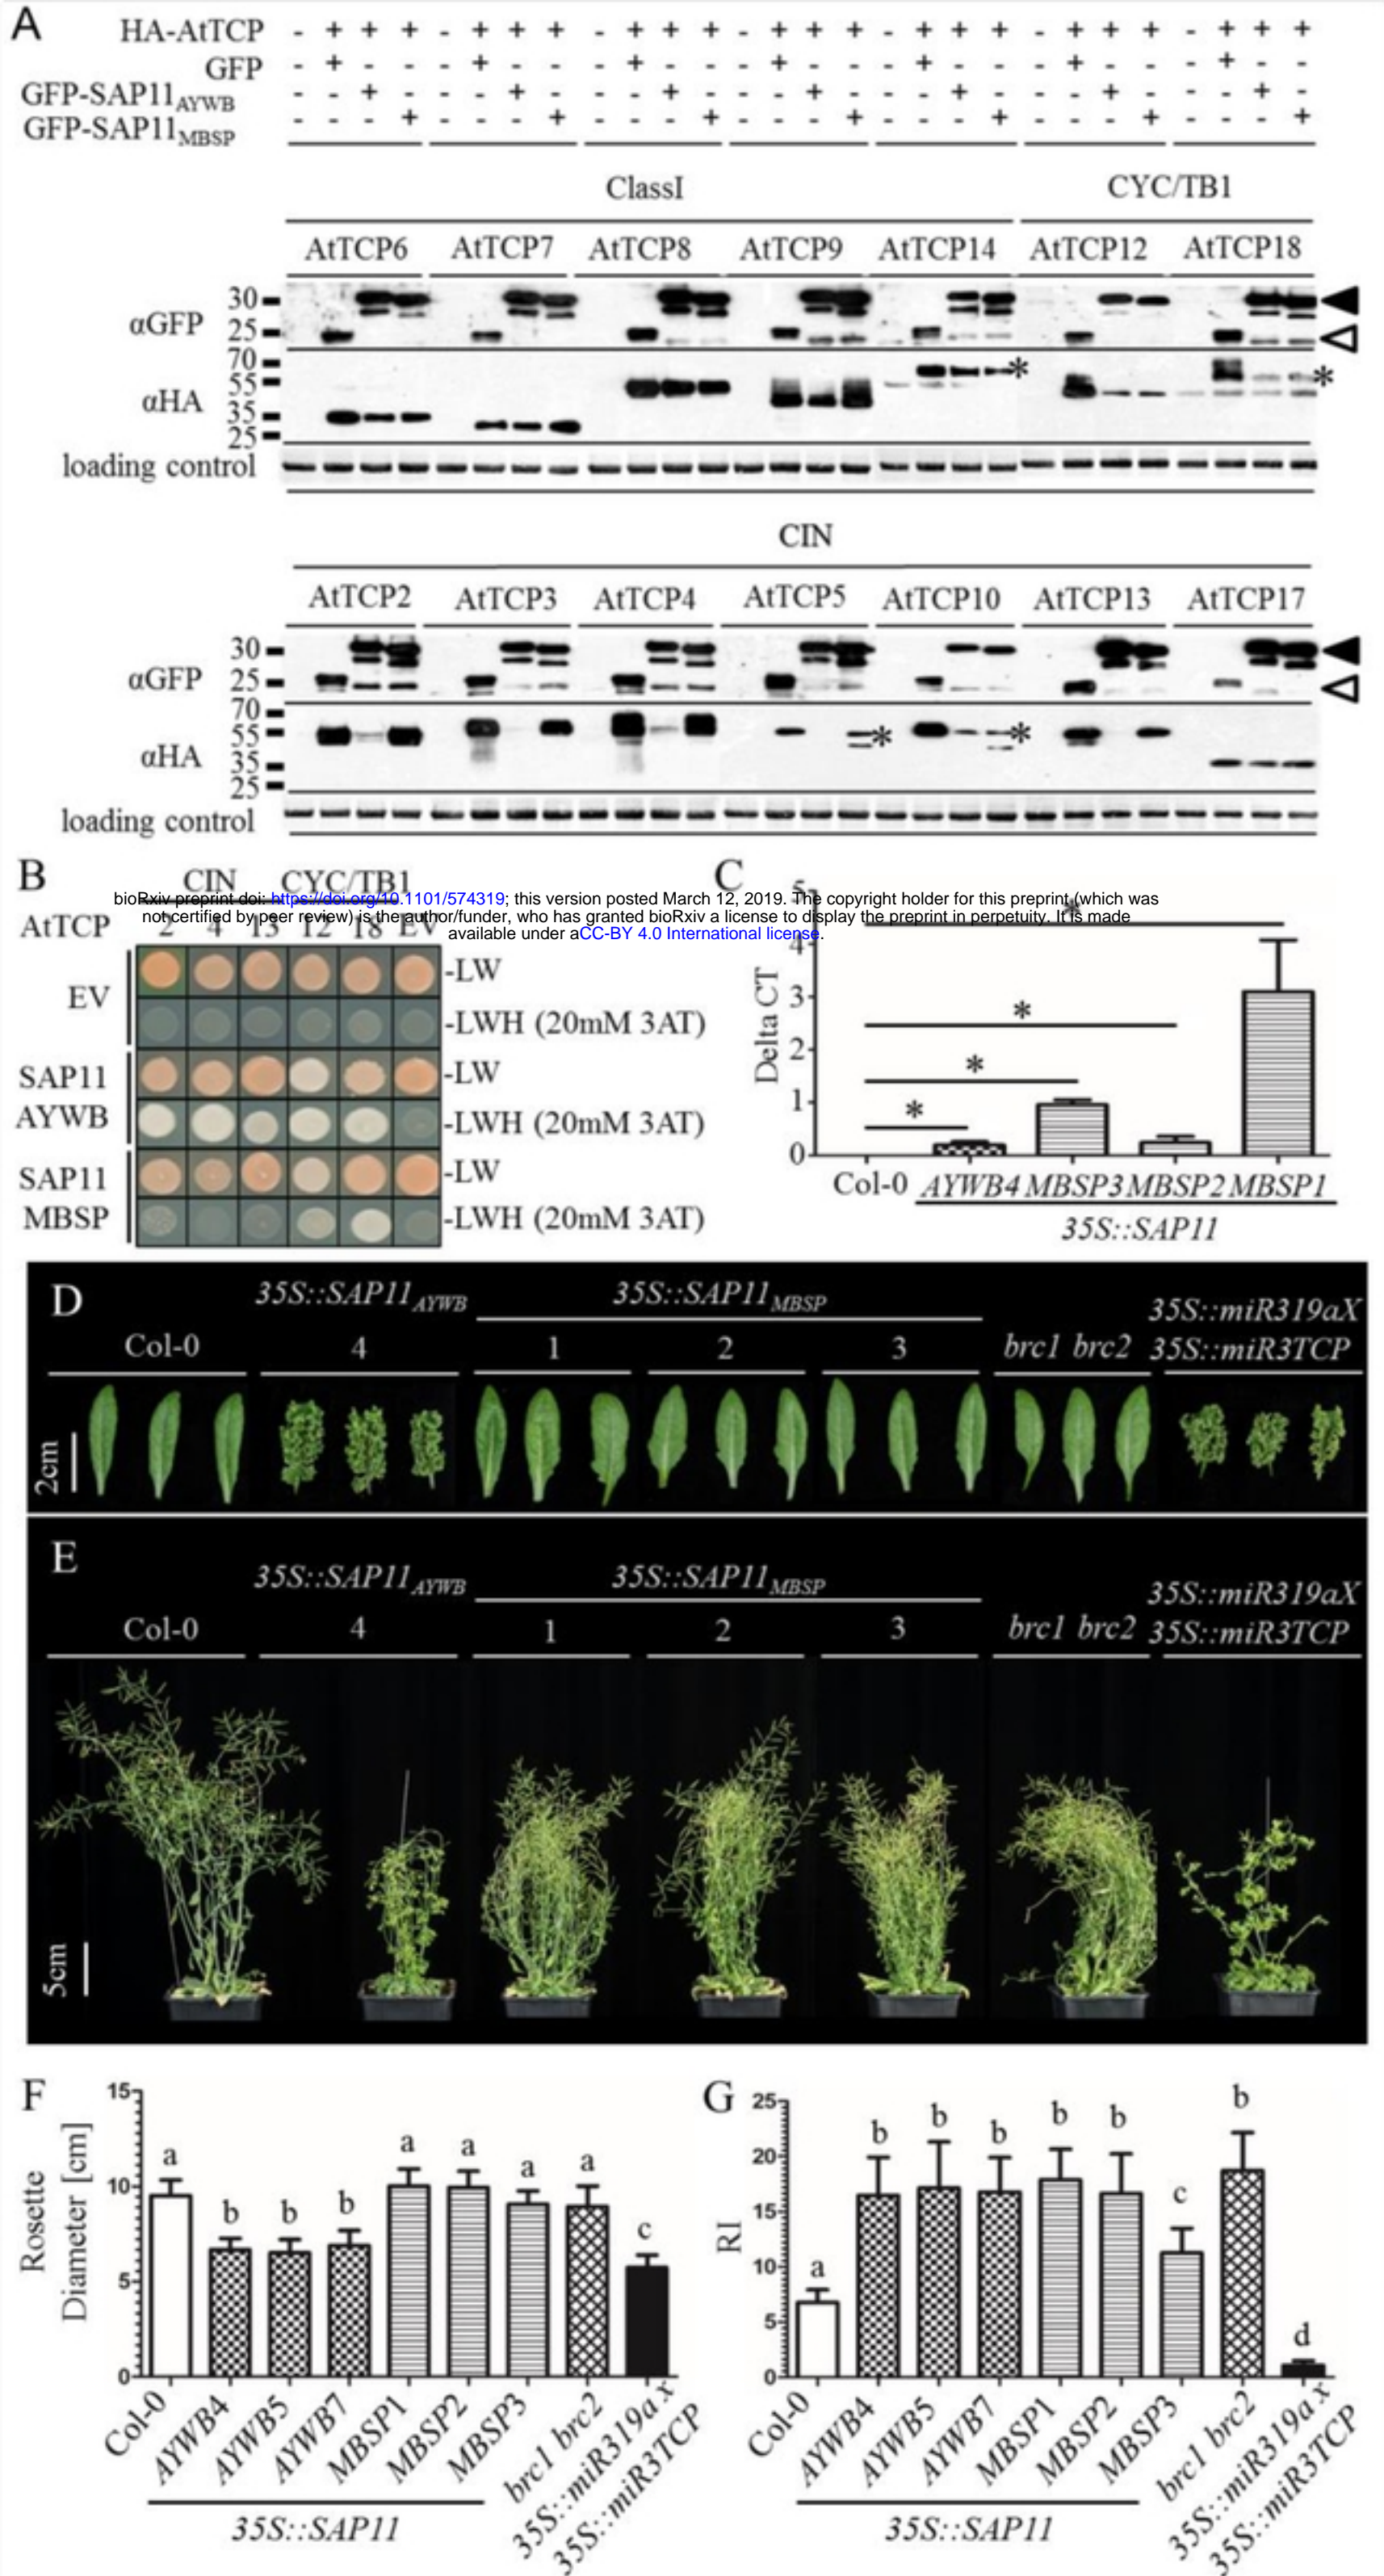

Fig1

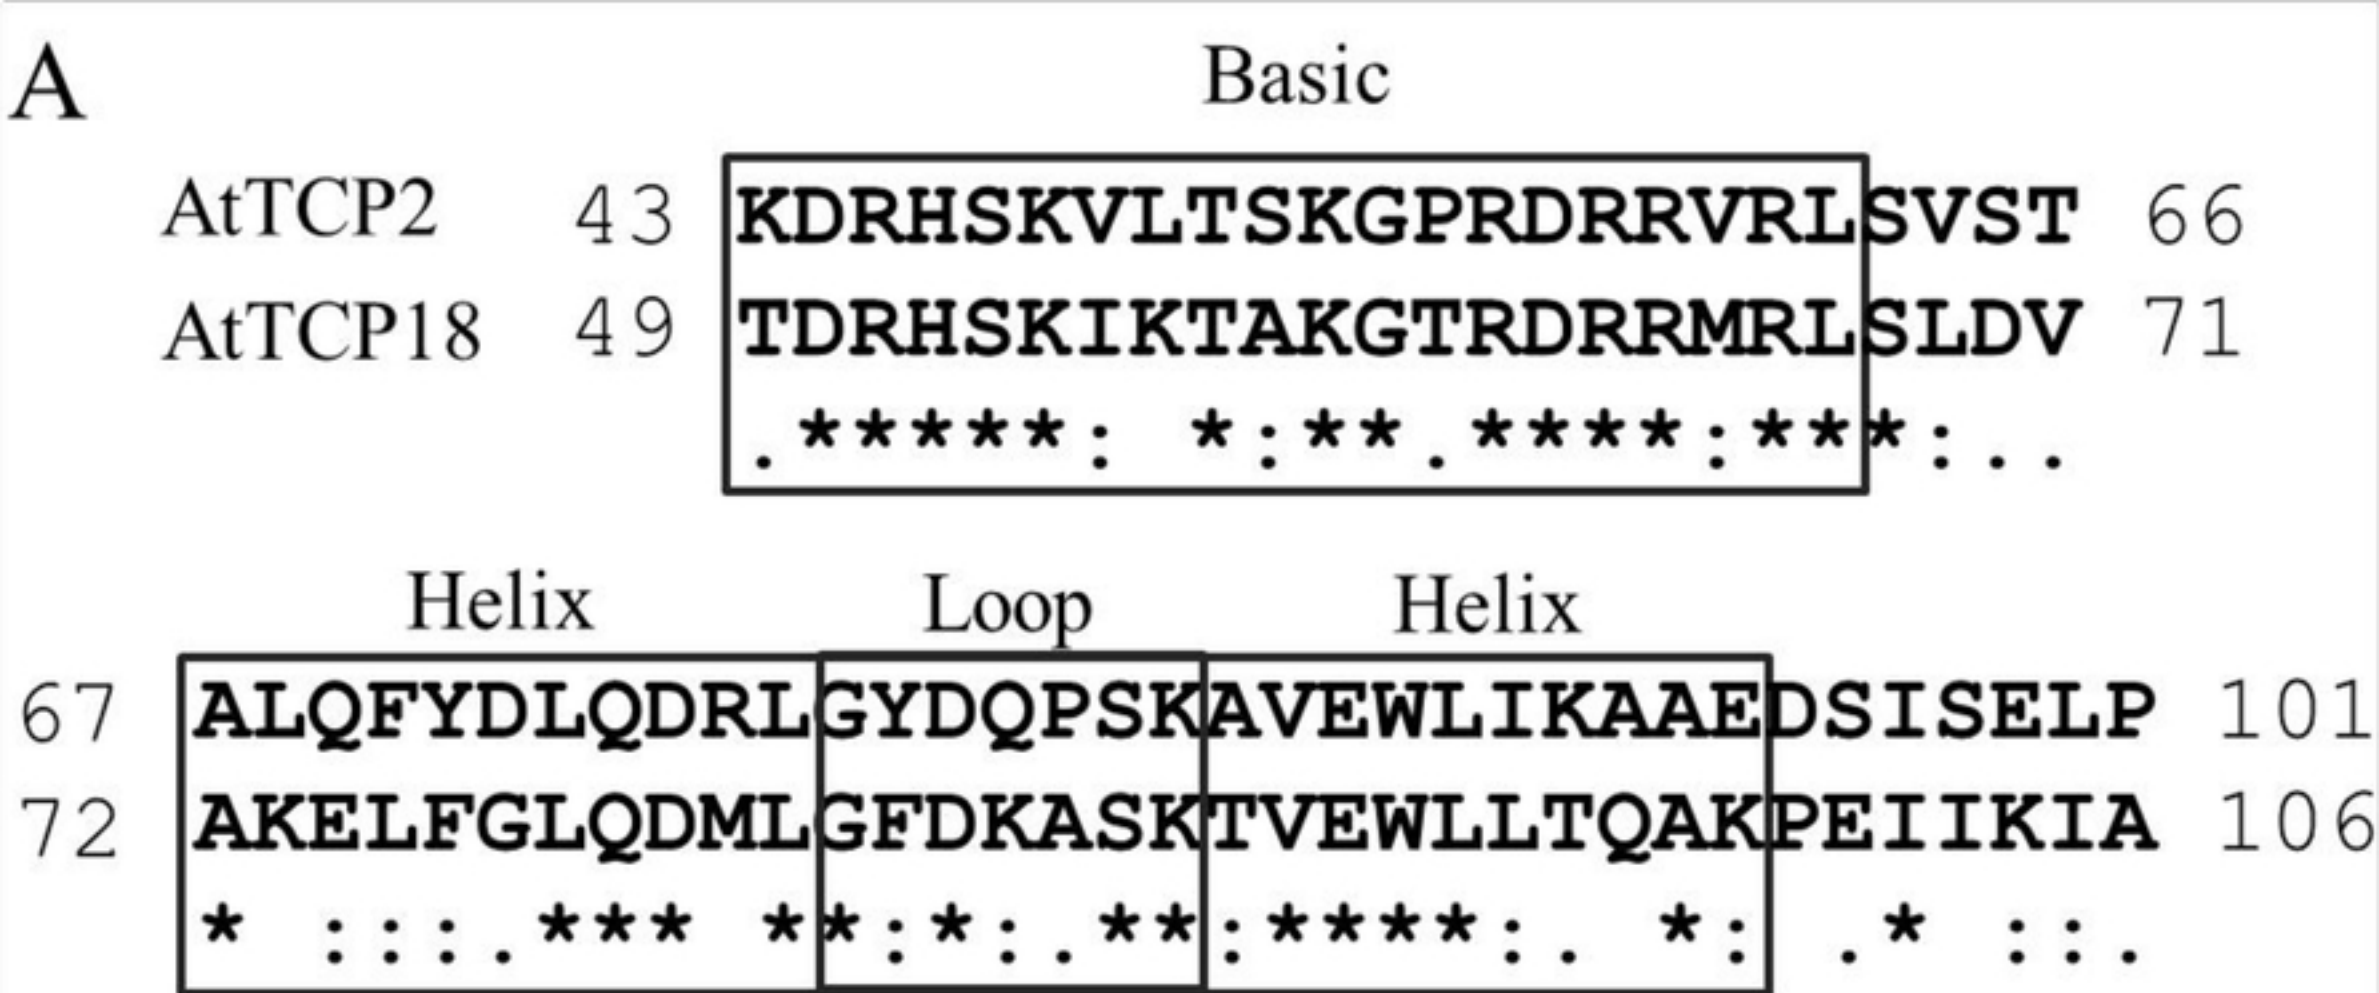

bioRxiv preprint doi: <https://doi.org/10.1101/574319>; this version posted March 12, 2019. The copyright holder for this preprint (which was not certified by peer review) is the author/funder, who has granted bioRxiv a license to display the preprint in perpetuity. It is made available under aCC-BY 4.0 International license.

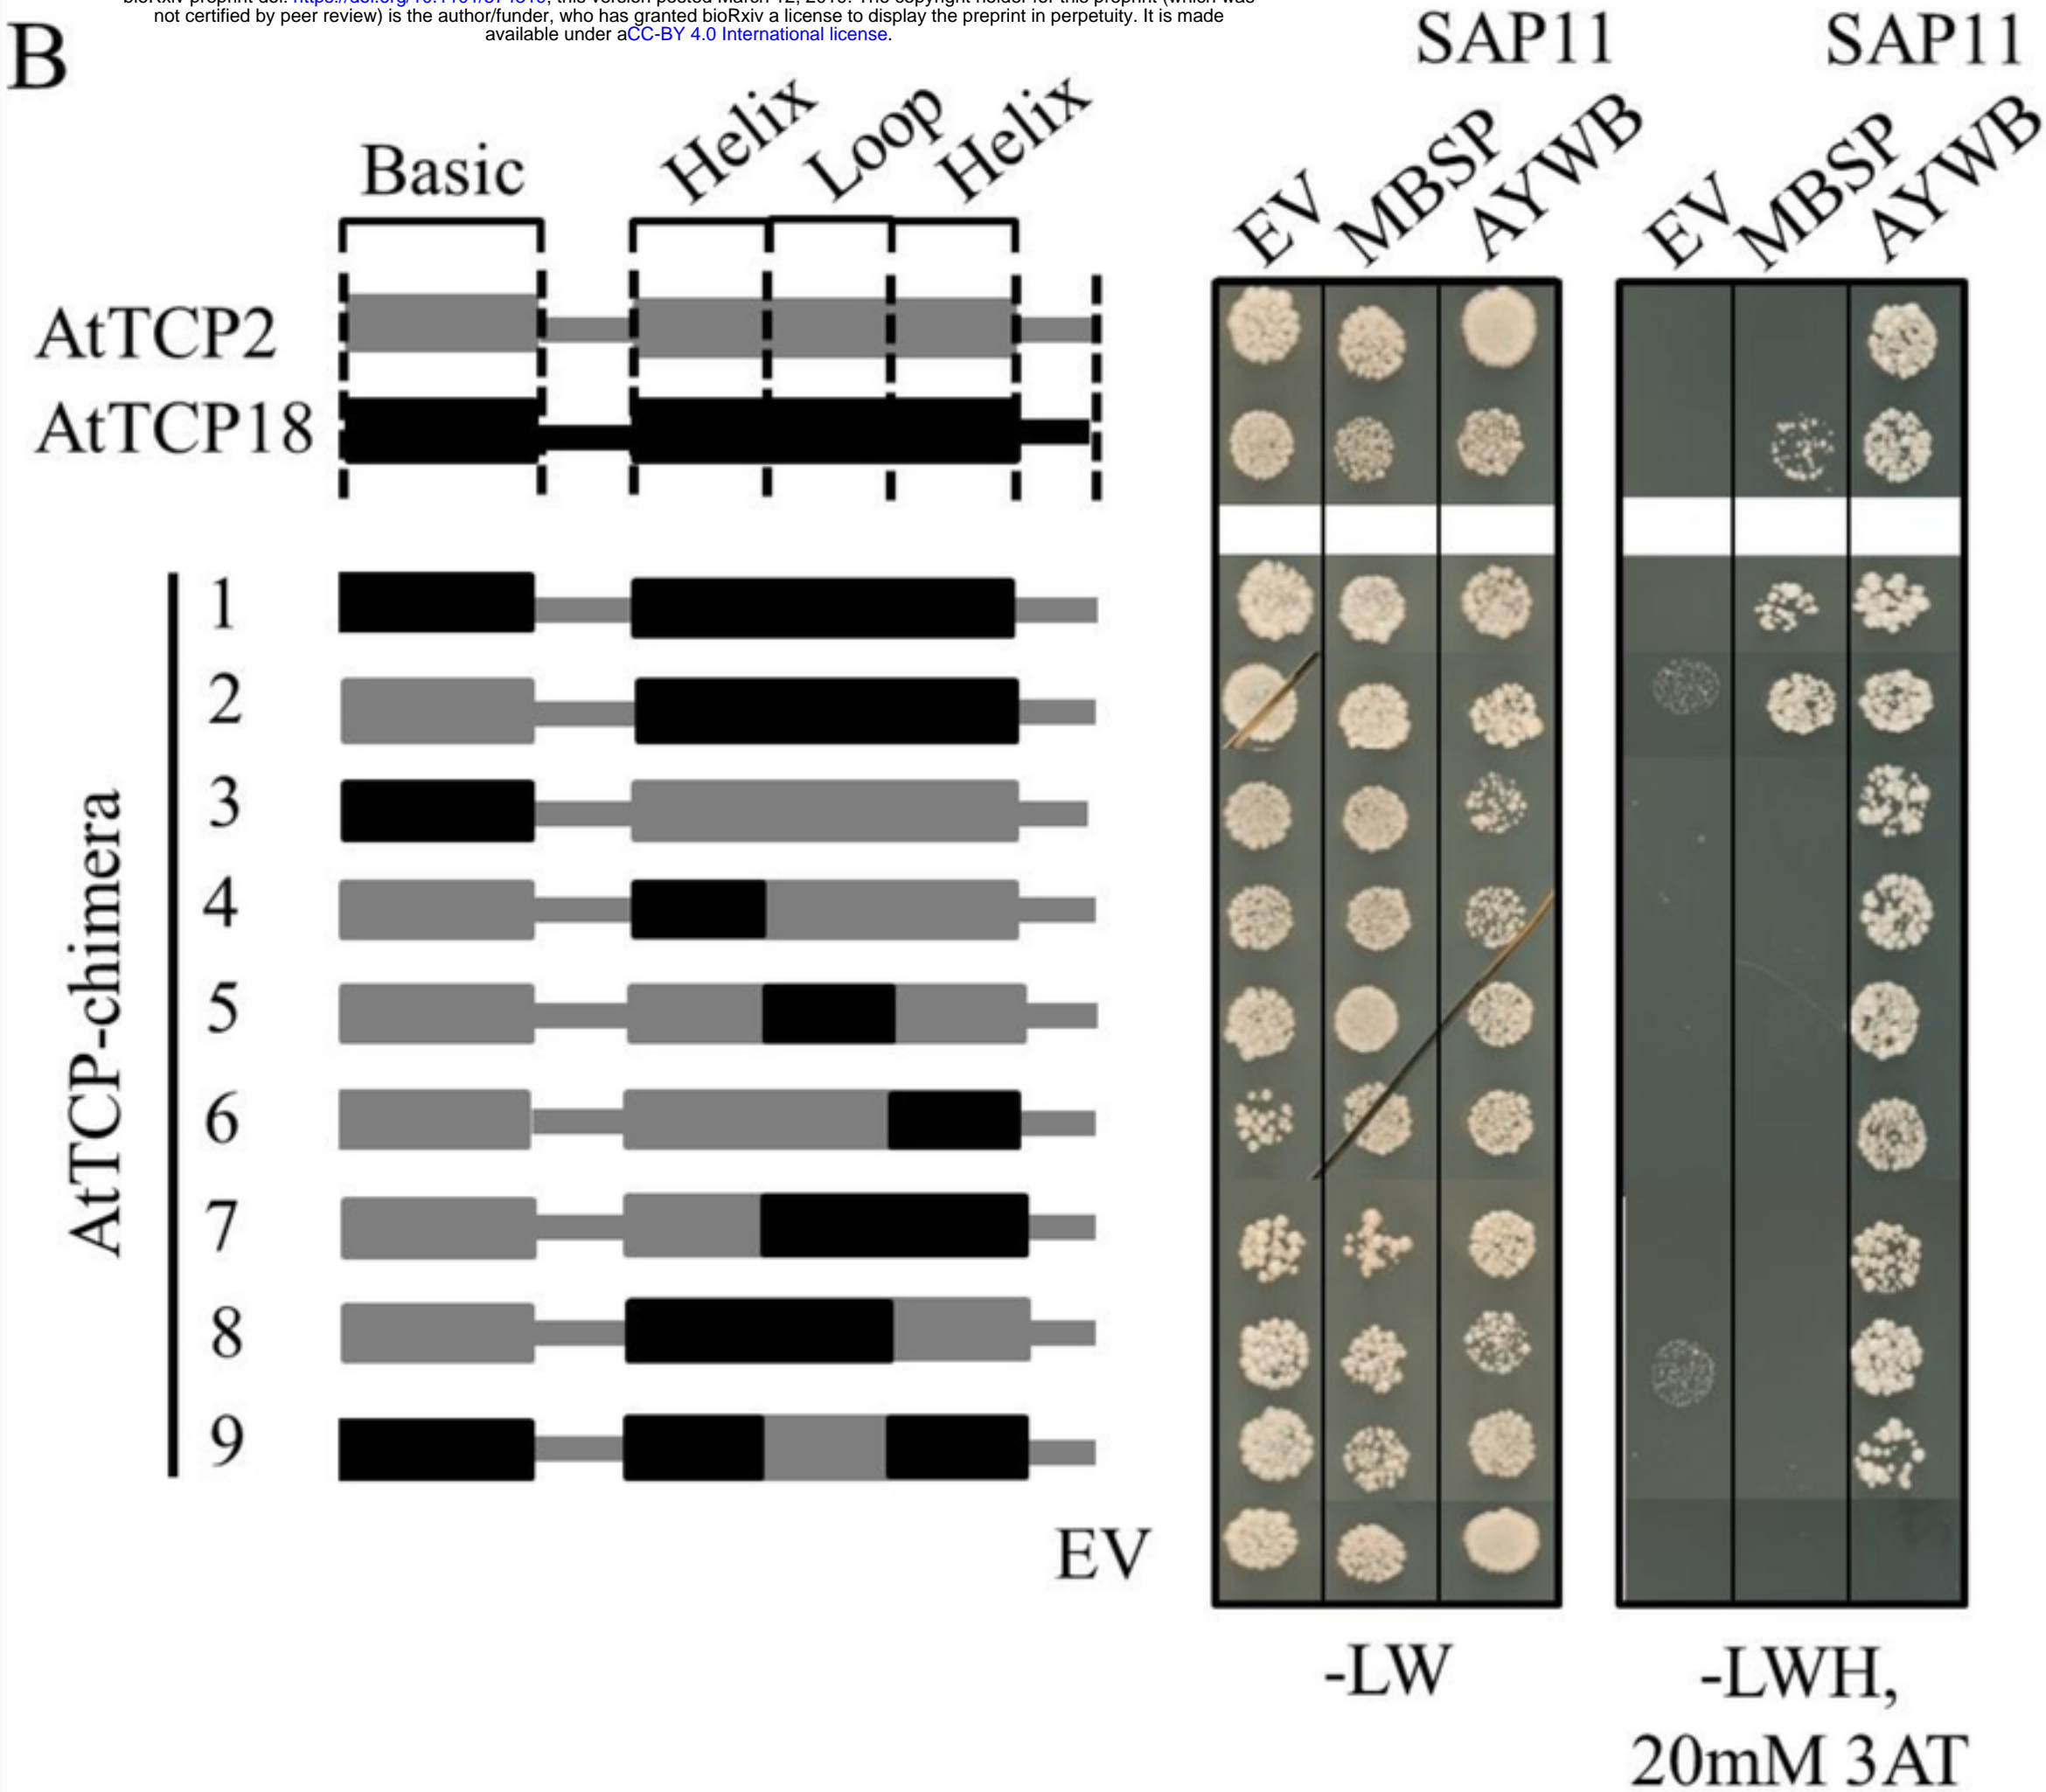

Fig2

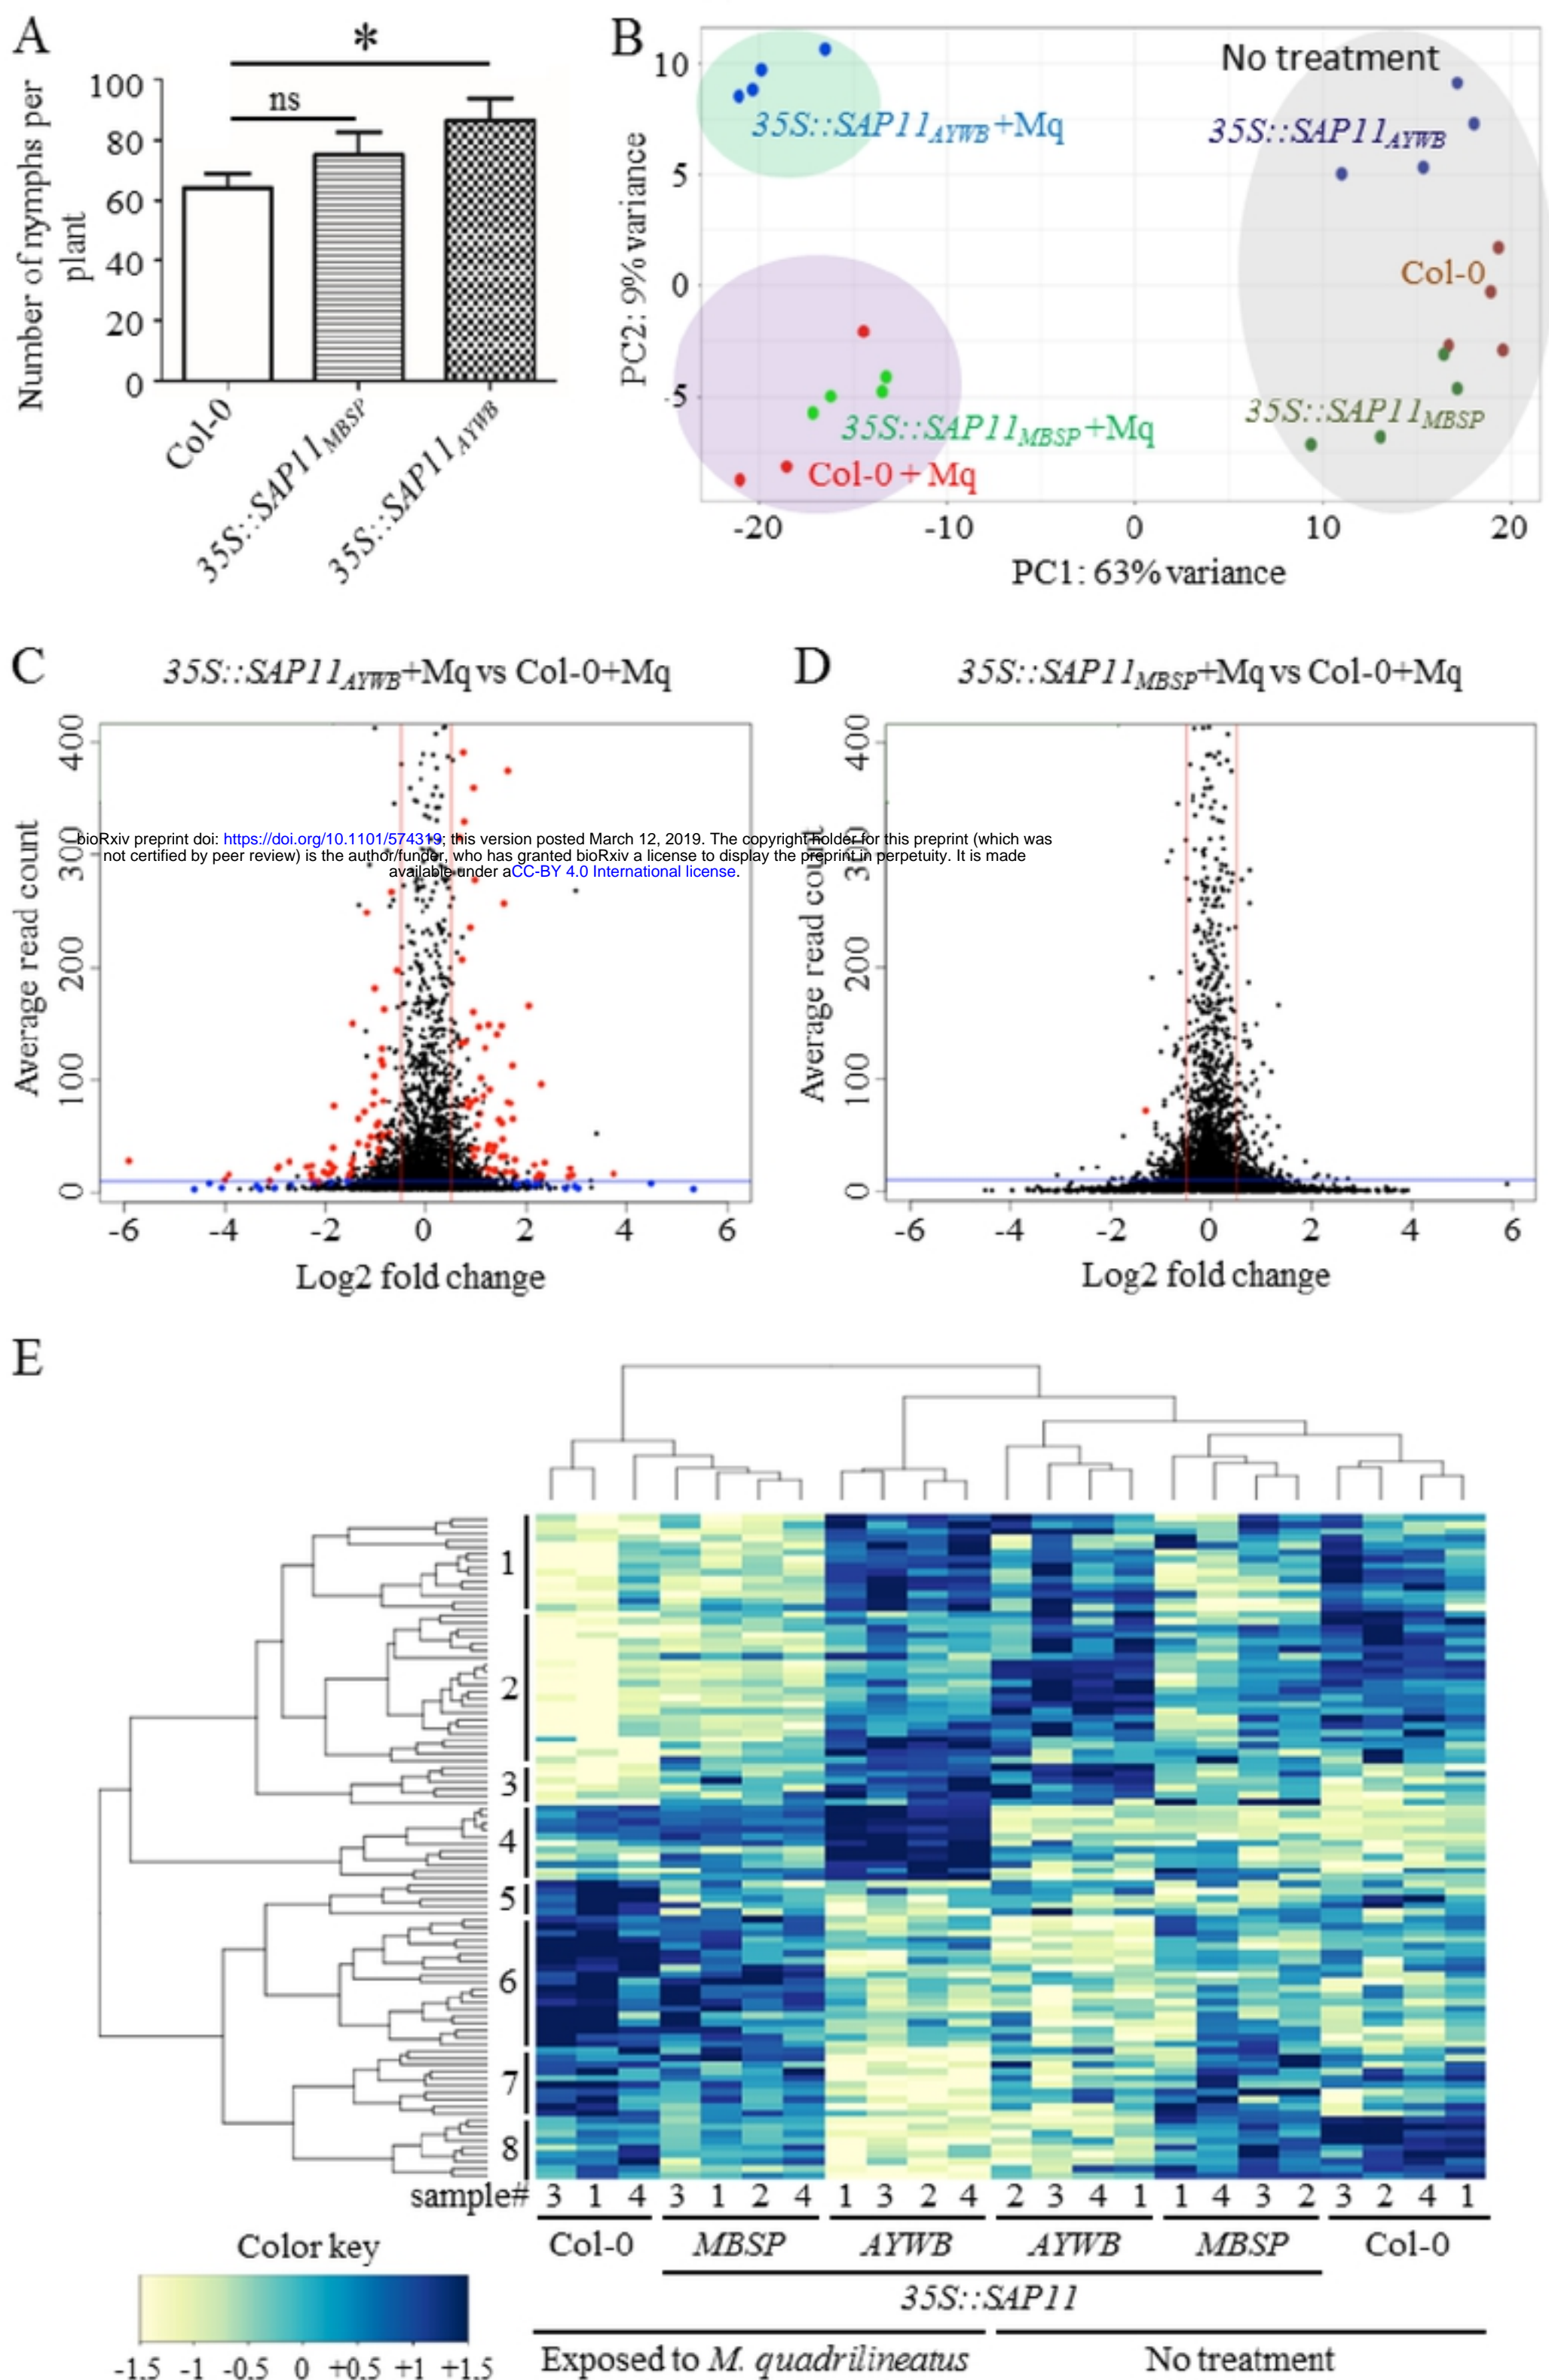

Fig3

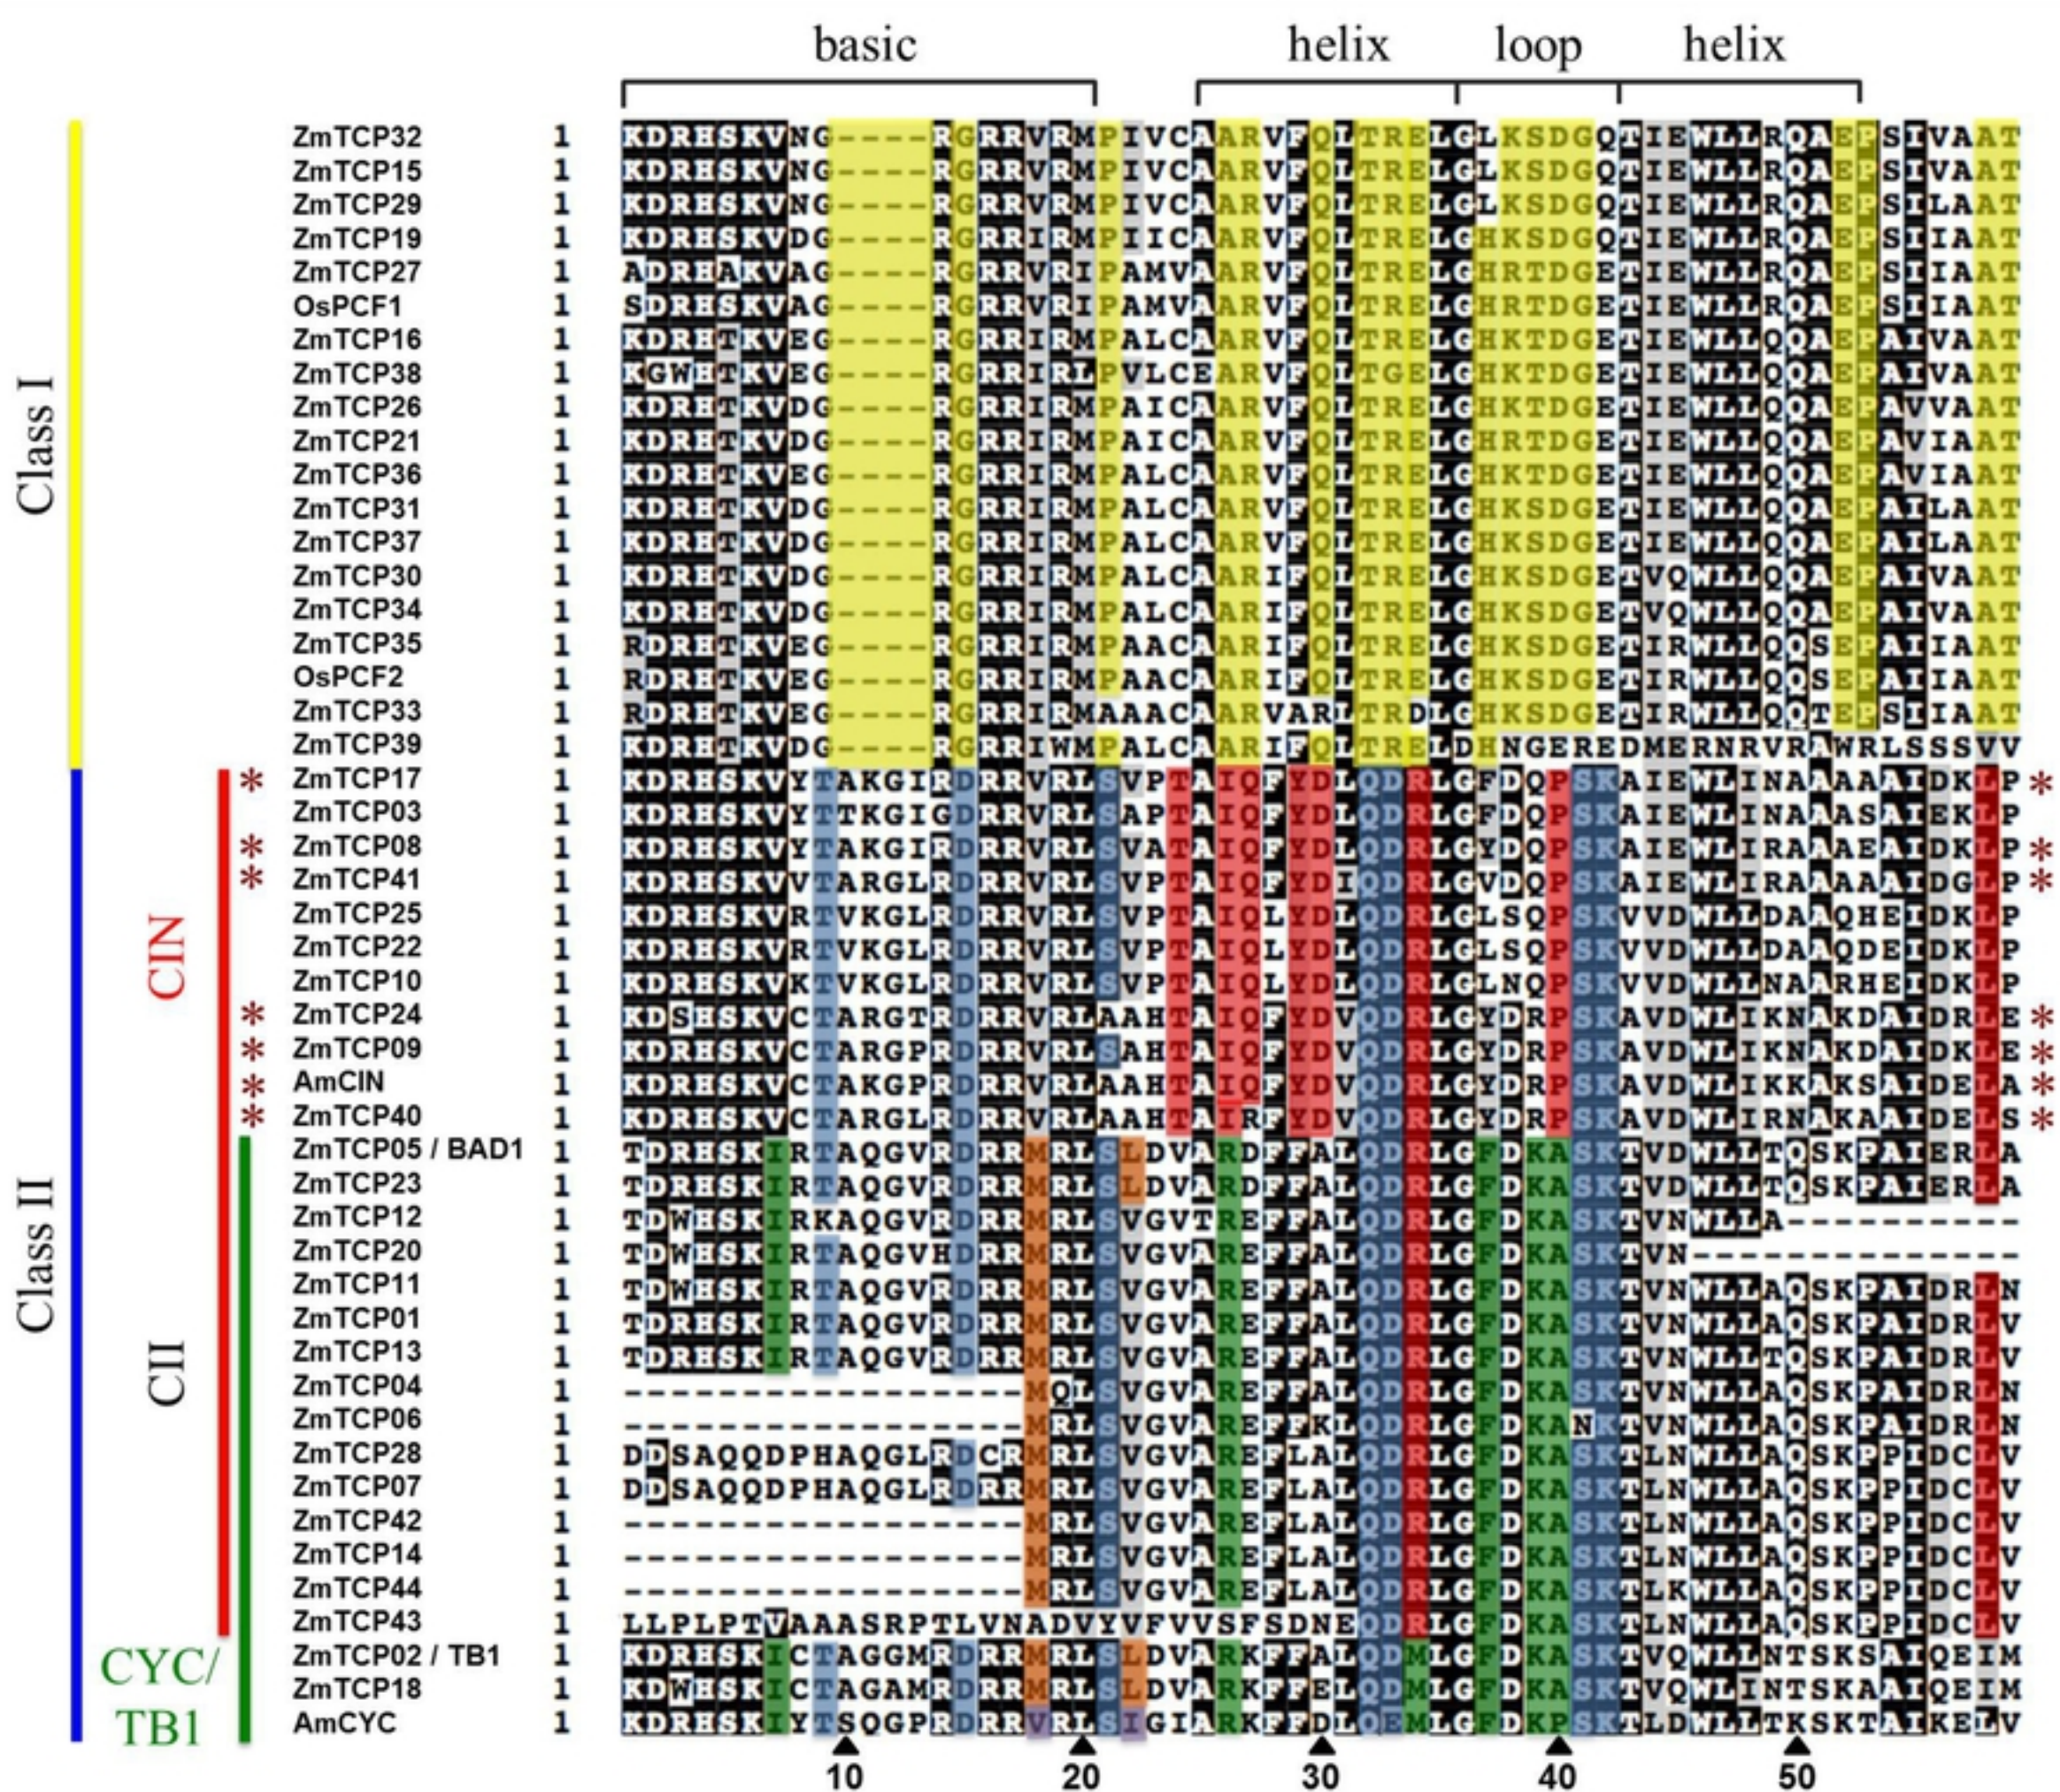

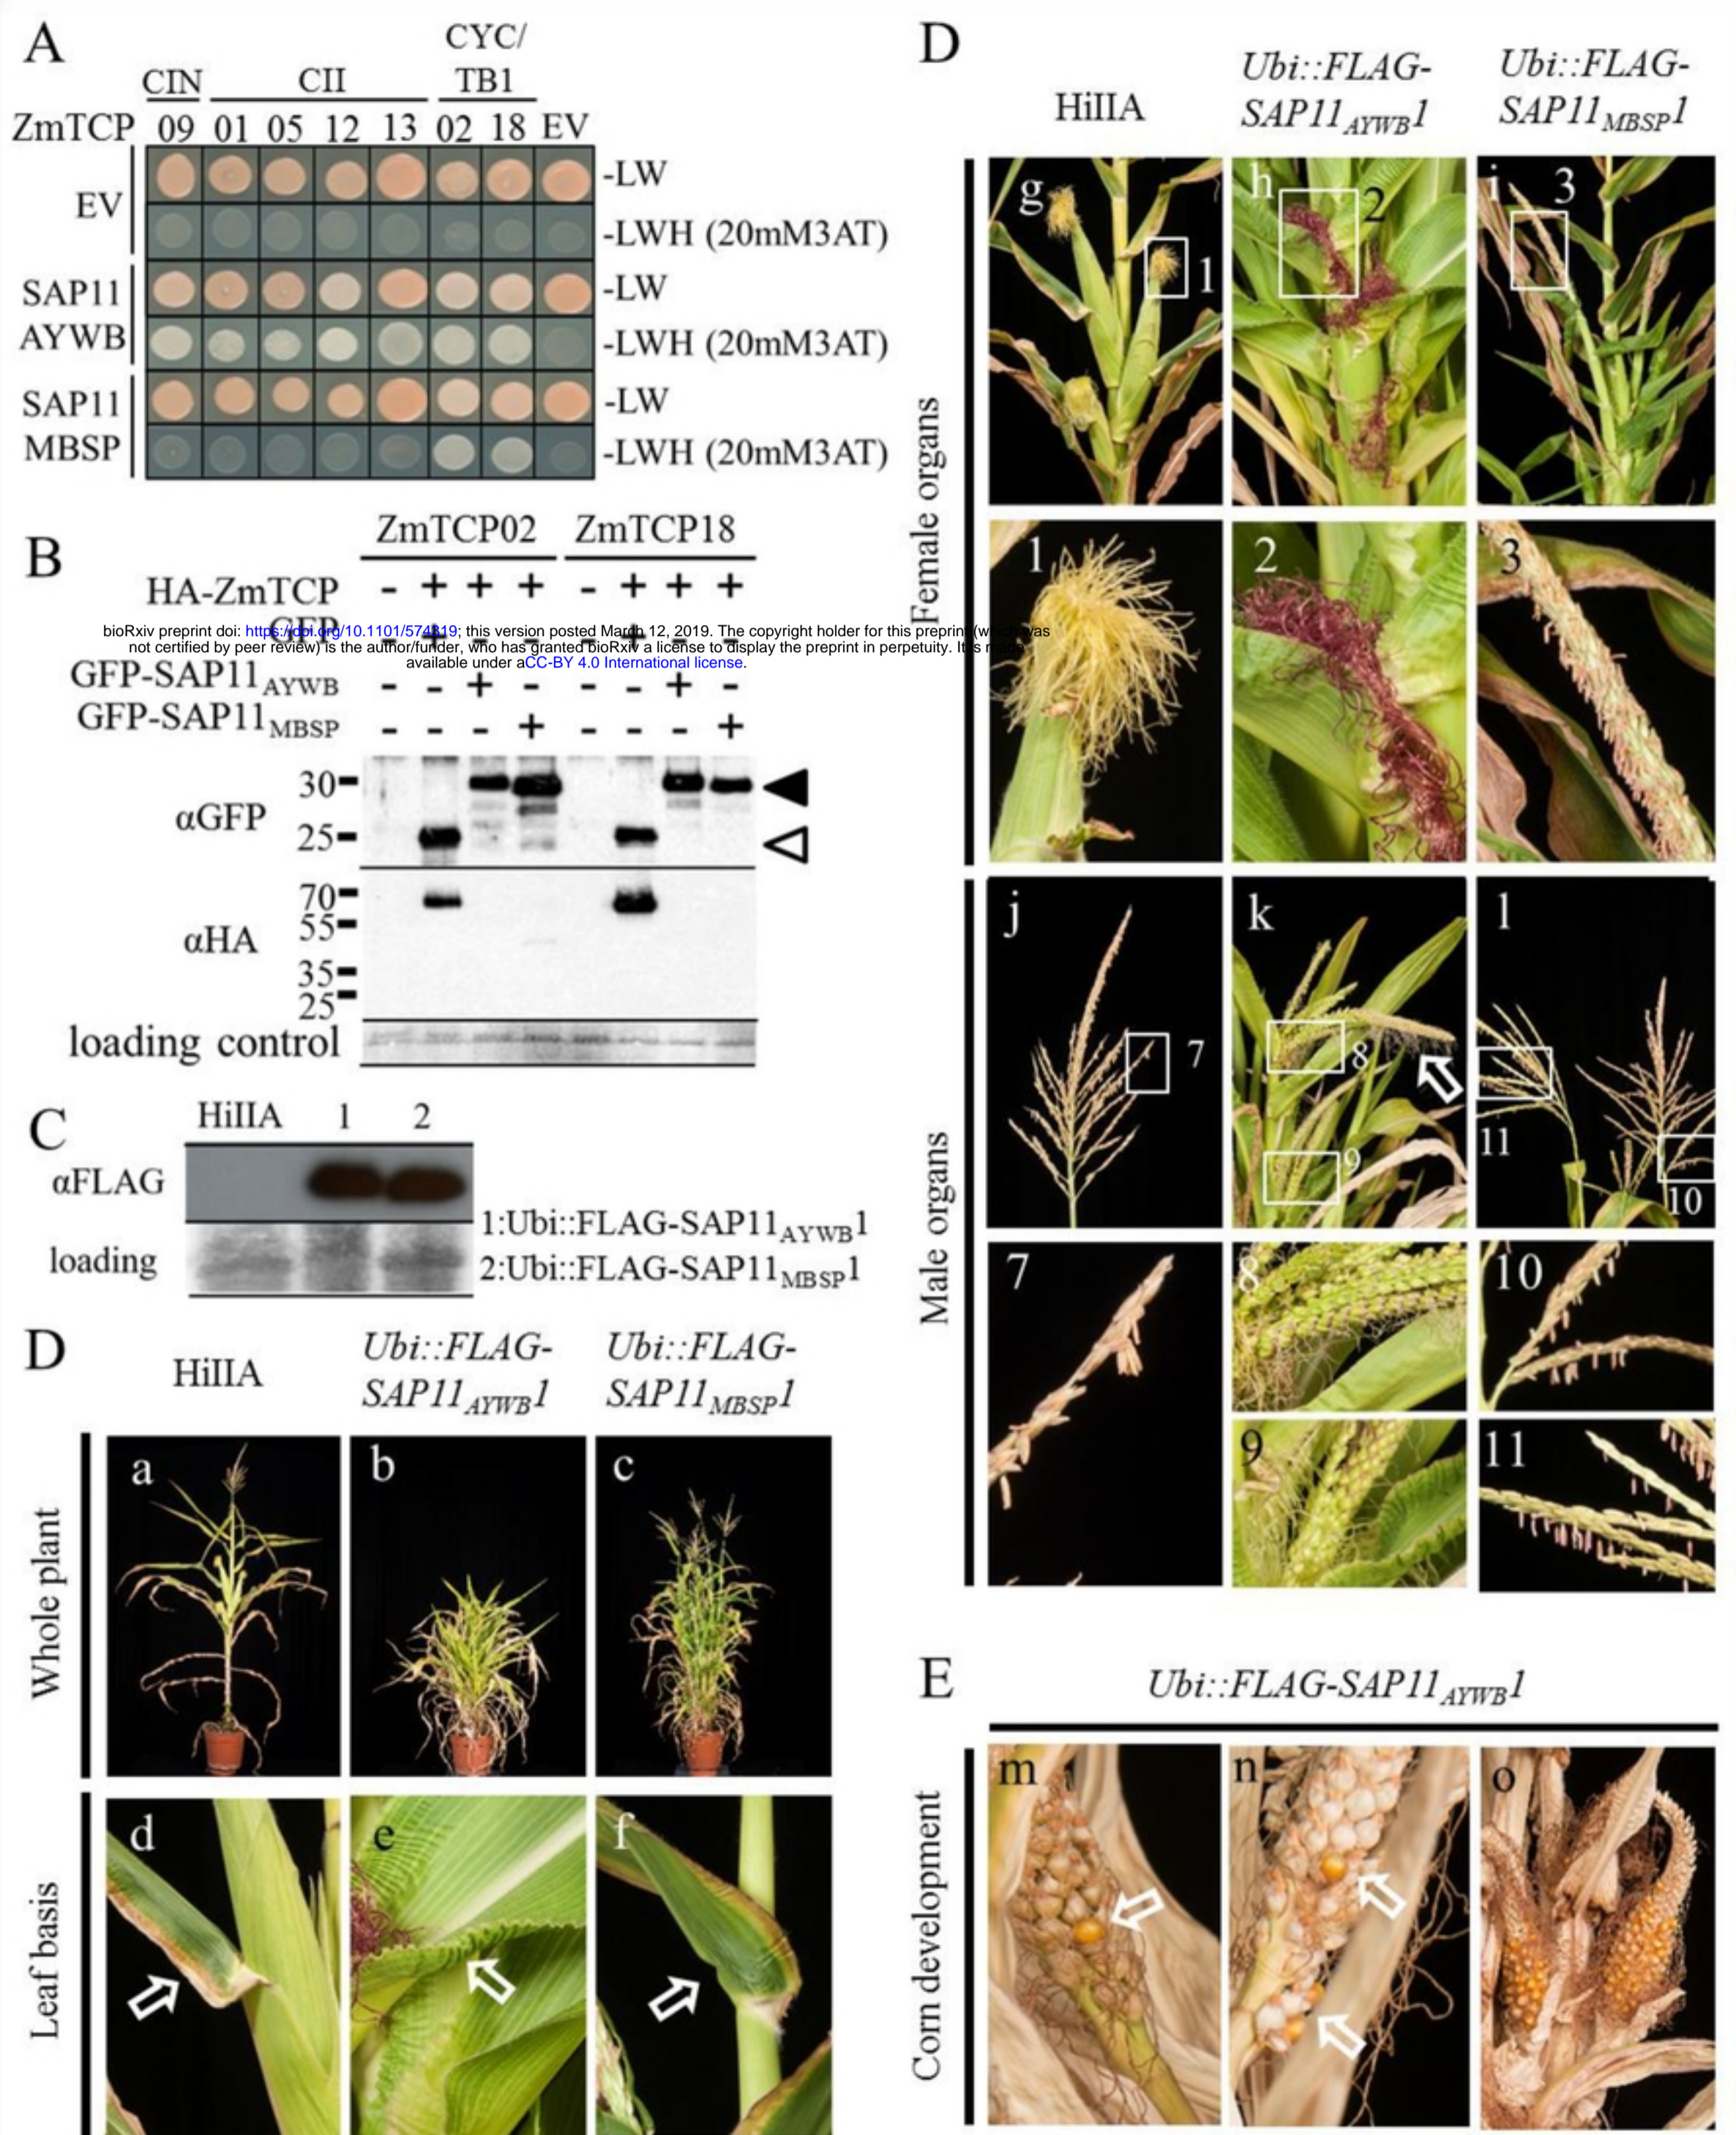

Fig5

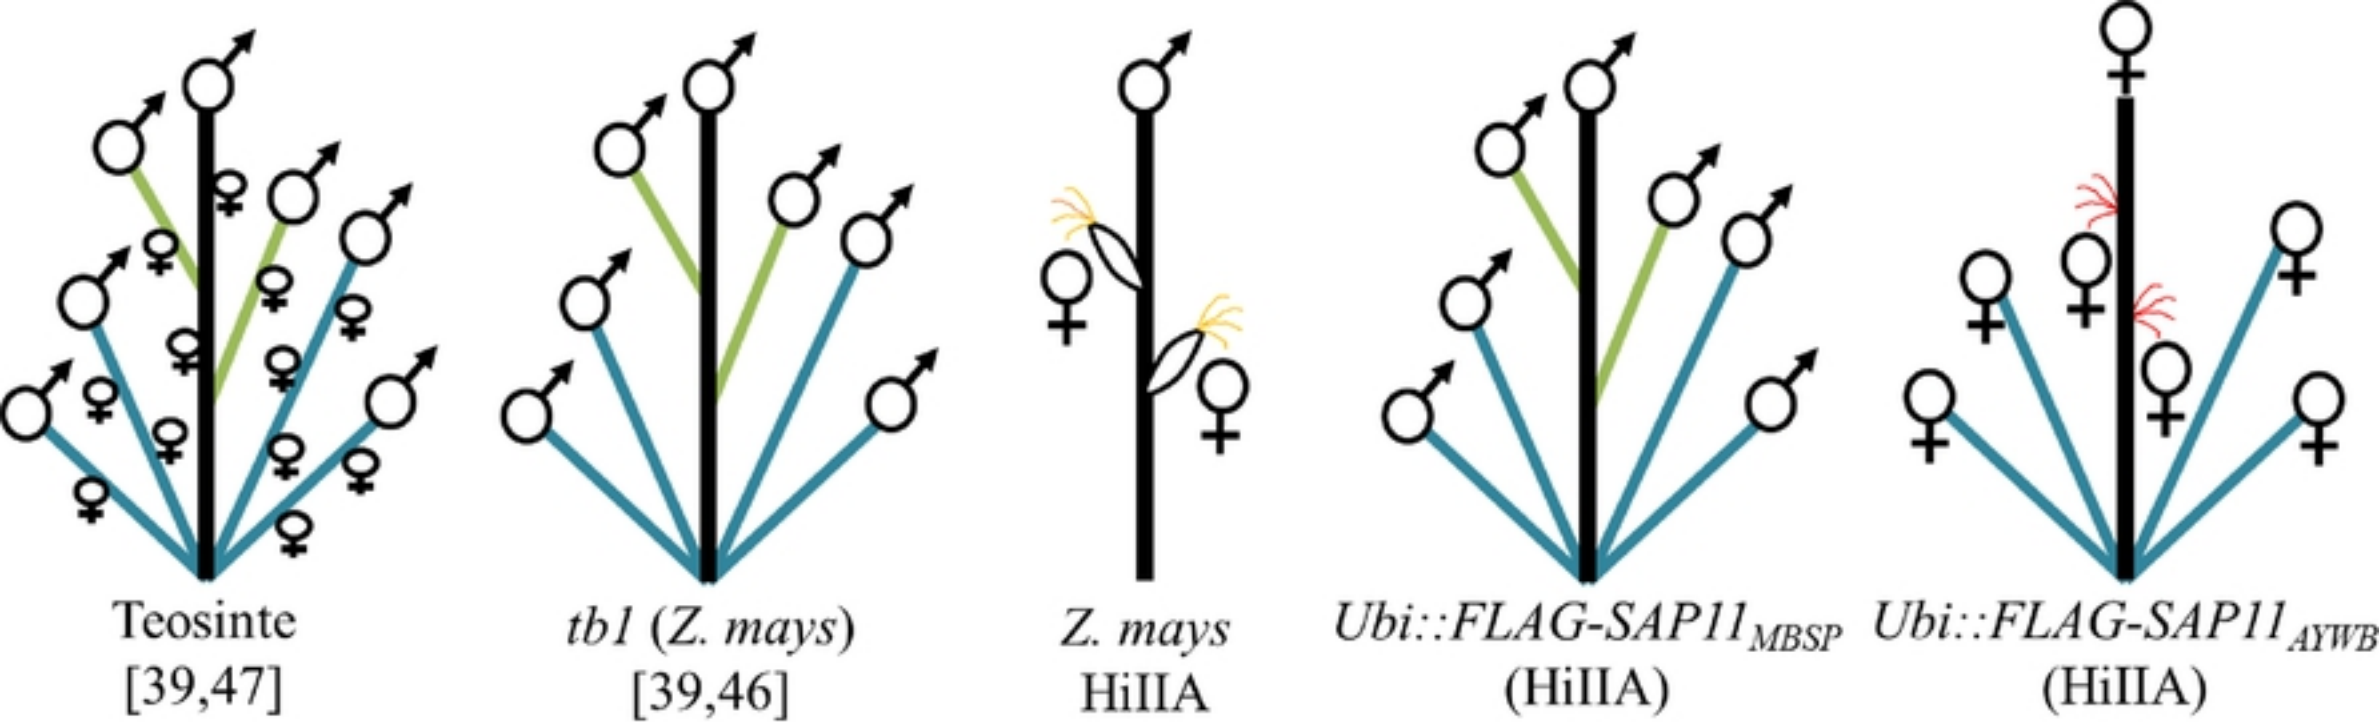

Fig6



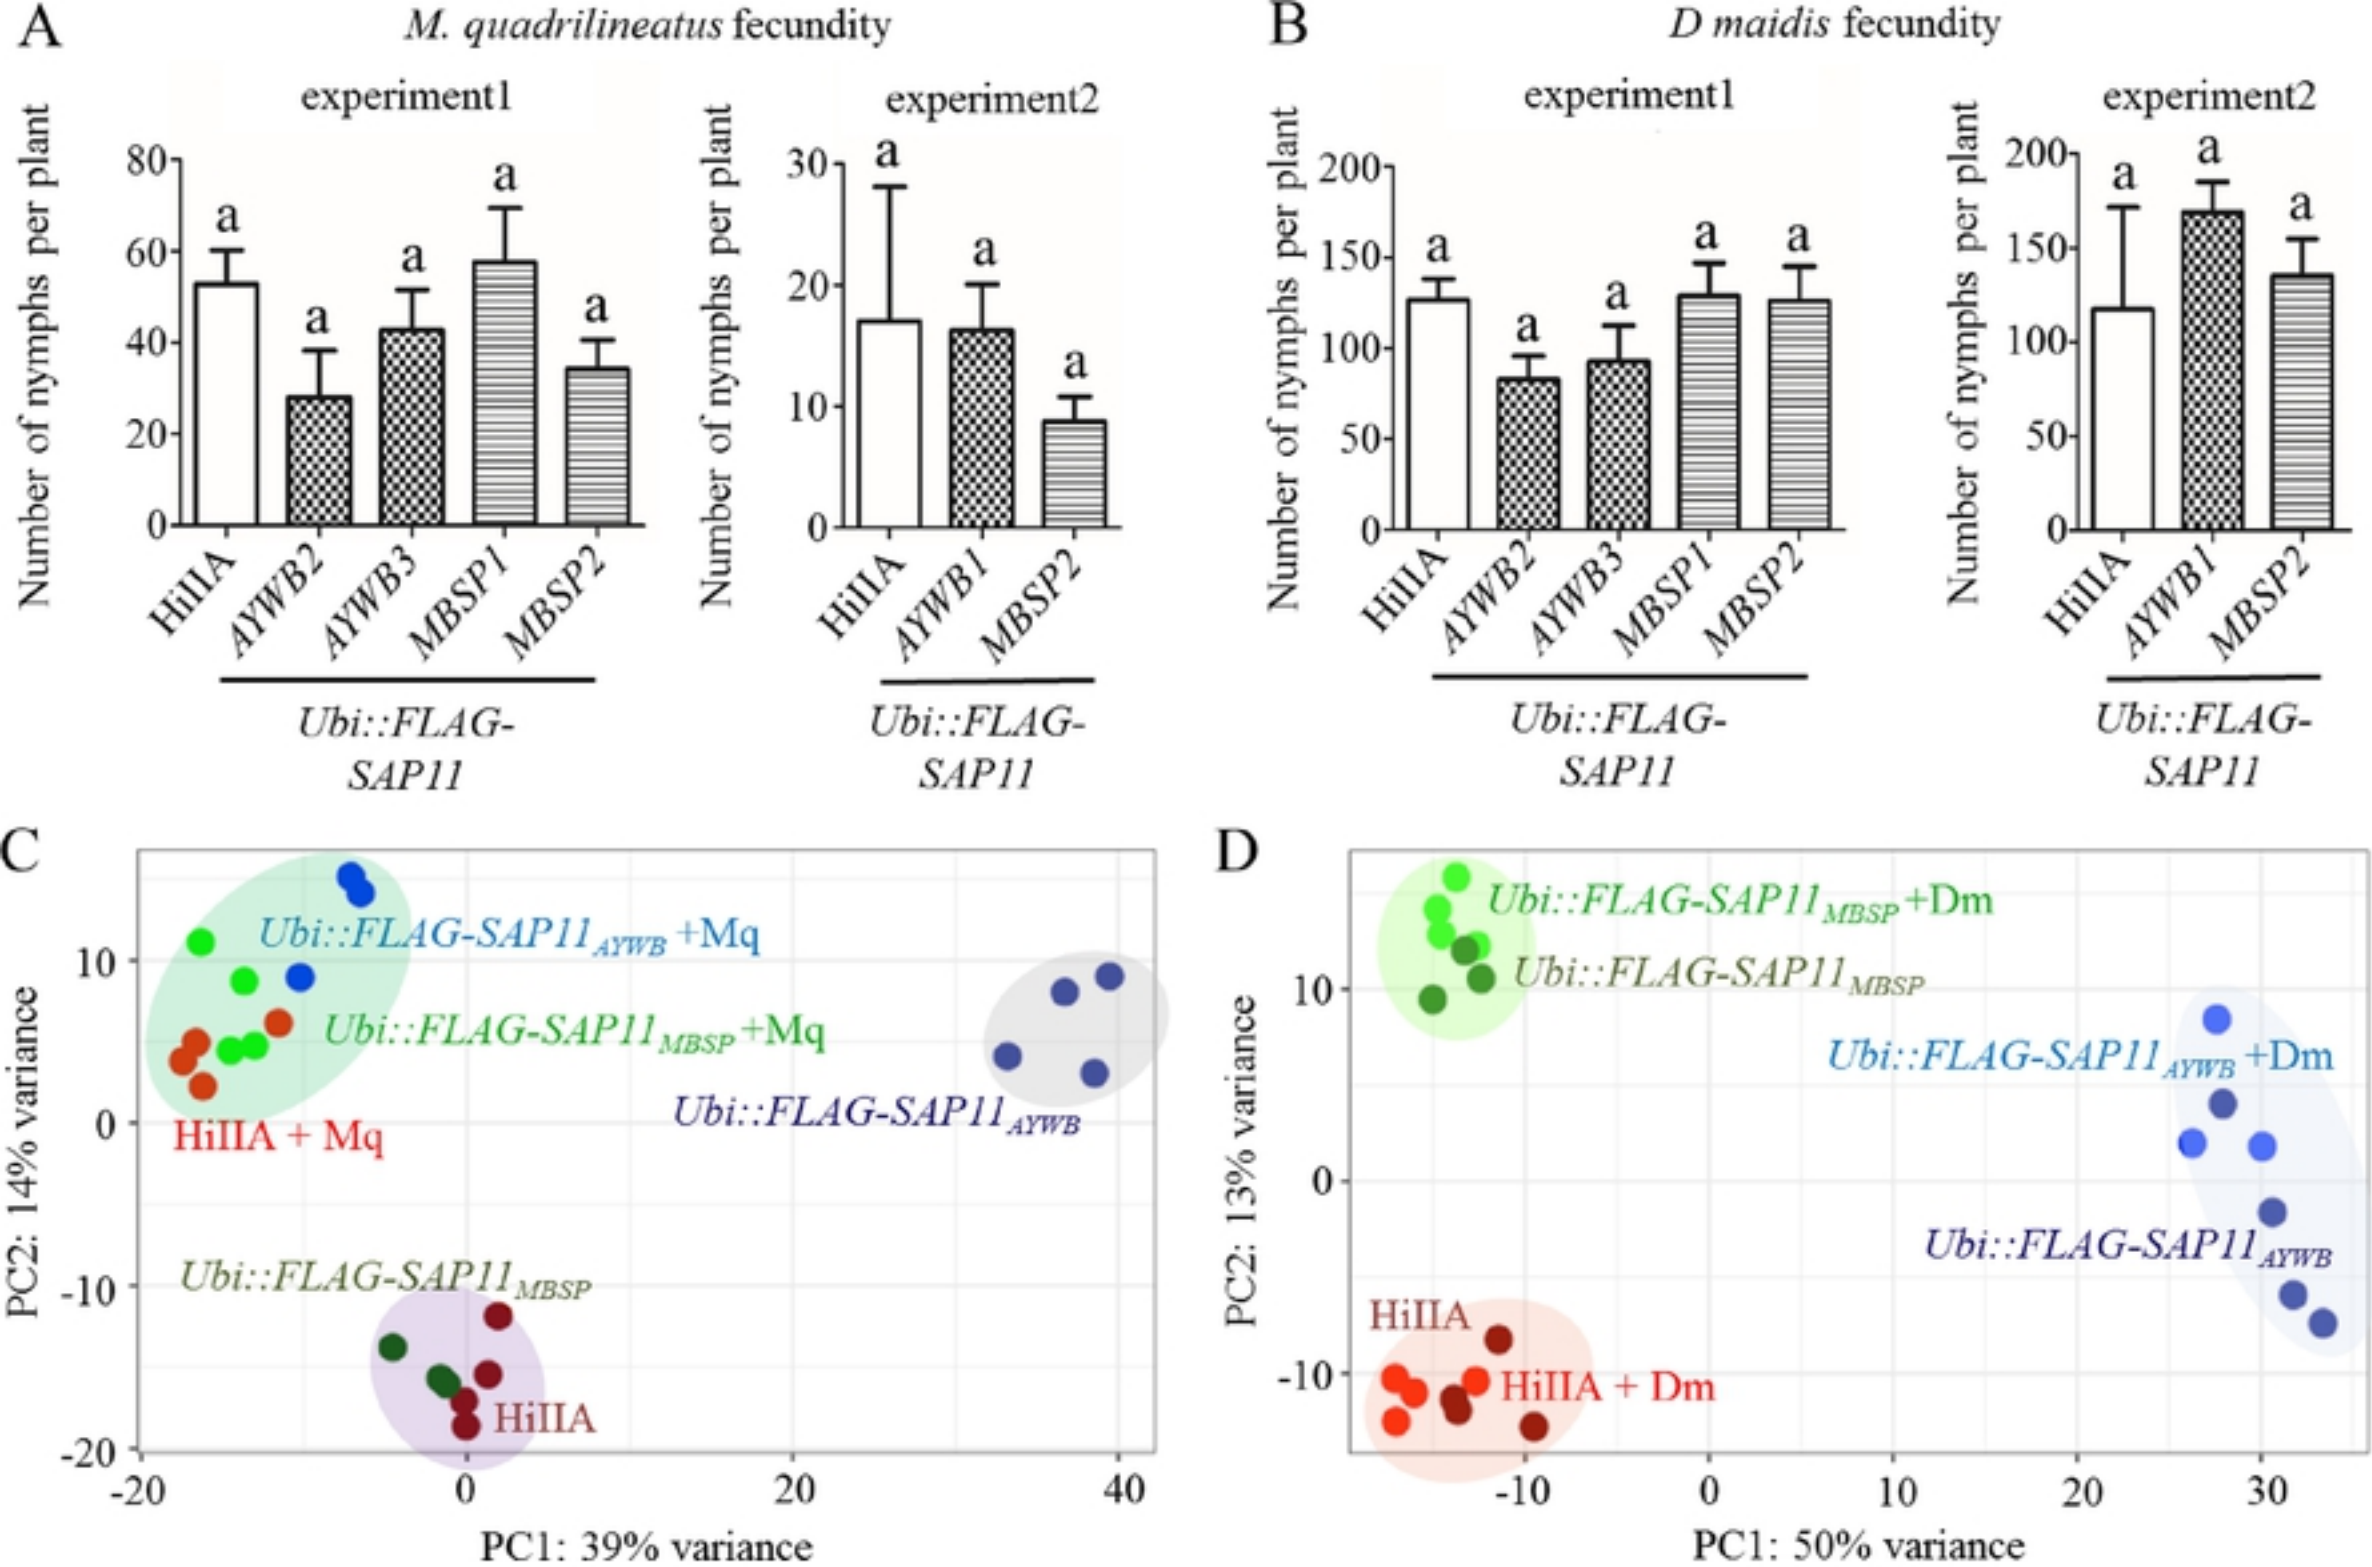

Fig7
